# Supplementary material for: N,N-Dimethyl-anthranilic Acid from Calvatia nipponica Mushroom Fruiting Bodies Induces Apoptotic Effects on MDA-MB-231 Human Breast Cancer Cells
Source: MDPI journal article supplement (doi:10.3390/nu15143091), 2023-07-10
Supplement: s1 [file s1]

## Supplementary Information

### ***N,N*-Dimethyl-Anthranilic Acid from *Calvatia nipponica* Mushroom Fruiting Bodies Induces Apoptotic Effects on MDA-MB-231 Human Breast Cancer Cells**

Dahae Lee <sup>1,†</sup>, Seulah Lee <sup>2,3,†</sup>, Yoon Seo Jang <sup>2</sup>, Rhim Ryoo <sup>4</sup>, Jung Kyu Kim <sup>5</sup>, Ki Sung Kang <sup>1,\*</sup>, and Ki Hyun Kim <sup>2,\*</sup>

<sup>1</sup> College of Korean Medicine, Gachon University, Seongnam 13120, Korea; pjsldh@naver.com (D.L.)

<sup>2</sup> School of Pharmacy, Sungkyunkwan University, Suwon 16419, Korea; lee.seulah@khu.ac.kr (S.L.); bbj0423@gmail.com (Y.S.J.)

<sup>3</sup> Department of Oriental Medicine Biotechnology, College of Life Sciences, Kyung Hee University, Yongin, 17104, Korea

<sup>4</sup> Special Forest Products Division, Forest Bioresources Department, National Institute of Forest Science, Suwon 16631, Korea; rryoo@korea.kr (R.R.)

<sup>5</sup> School of Chemical Engineering, Sungkyunkwan University, Suwon 16419, Korea; legkim@skku.edu (J.K.K.)

<sup>6</sup> STL company, Yongin 17086, Korea; hkkim@stlcorp.net (H.K.K.)

\* Correspondence: khkim83@skku.edu (K.H.K.); +82-31-290-7700 (K.H.K.); kkang@gachon.ac.kr (K.S.K.); Tel.: +82-31-750-5402 (K.S.K.)

† These authors contributed equally to this study.

## Supporting Information Contents:

|                                                                                               |     |
|-----------------------------------------------------------------------------------------------|-----|
| Figure S1. $^1\text{H}$ NMR spectrum of <b>1</b> ( $\text{CD}_3\text{OD}$ , 700 MHz).....     | S4  |
| Figure S2. $^{13}\text{C}$ NMR spectrum of <b>1</b> ( $\text{CD}_3\text{OD}$ , 175 MHz).....  | S5  |
| Figure S3. ESIMS spectrum of <b>1</b> .....                                                   | S6  |
| Figure S4. $^1\text{H}$ NMR spectrum of <b>2</b> ( $\text{CD}_3\text{OD}$ , 700 MHz).....     | S7  |
| Figure S5. $^{13}\text{C}$ NMR spectrum of <b>2</b> ( $\text{CD}_3\text{OD}$ , 175 MHz).....  | S8  |
| Figure S6. $^1\text{H}$ NMR spectrum of <b>3</b> ( $\text{CD}_3\text{OD}$ , 700 MHz).....     | S9  |
| Figure S7. $^{13}\text{C}$ NMR spectrum of <b>3</b> ( $\text{CD}_3\text{OD}$ , 175 MHz).....  | S10 |
| Figure S8. ESIMS spectrum of <b>3</b> .....                                                   | S11 |
| Figure S9. $^1\text{H}$ NMR spectrum of <b>4</b> ( $\text{CD}_3\text{OD}$ , 700 MHz).....     | S12 |
| Figure S10. $^{13}\text{C}$ NMR spectrum of <b>4</b> ( $\text{CD}_3\text{OD}$ , 175 MHz)..... | S13 |
| Figure S11. ESIMS spectrum of <b>4</b> .....                                                  | S14 |
| Figure S12. $^1\text{H}$ NMR spectrum of <b>5</b> ( $\text{CDCl}_3$ , 700 MHz).....           | S15 |
| Figure S13. $^{13}\text{C}$ NMR spectrum of <b>5</b> ( $\text{CDCl}_3$ , 175 MHz).....        | S16 |
| Figure S14. ESIMS spectrum of <b>5</b> .....                                                  | S17 |
| Figure S15. $^1\text{H}$ NMR spectrum of <b>6</b> ( $\text{CD}_3\text{OD}$ , 700 MHz).....    | S18 |
| Figure S16. ESIMS spectrum of <b>6</b> .....                                                  | S19 |
| Figure S17. $^1\text{H}$ NMR spectrum of <b>7</b> ( $\text{CDCl}_3$ , 700 MHz).....           | S20 |
| Figure S18. ESIMS spectrum of <b>7</b> .....                                                  | S21 |
| Figure S19. $^1\text{H}$ NMR spectrum of <b>8</b> ( $\text{CD}_3\text{OD}$ , 700 MHz).....    | S22 |
| Figure S20. $^{13}\text{C}$ NMR spectrum of <b>8</b> ( $\text{CD}_3\text{OD}$ , 175 MHz)..... | S23 |
| Figure S21. ESIMS spectrum of <b>8</b> .....                                                  | S24 |
| Figure S22. $^1\text{H}$ NMR spectrum of <b>9</b> ( $\text{CDCl}_3$ , 700 MHz).....           | S25 |
| Figure S23. ESIMS spectrum of <b>9</b> .....                                                  | S26 |
| Figure S24. $^1\text{H}$ NMR spectrum of <b>10</b> ( $\text{CDCl}_3$ , 700 MHz).....          | S27 |
| Figure S25. $^1\text{H}$ NMR spectrum of <b>11</b> ( $\text{CDCl}_3$ , 700 MHz).....          | S28 |
| Figure S26. $^{13}\text{C}$ NMR spectrum of <b>11</b> ( $\text{CDCl}_3$ , 175 MHz).....       | S29 |
| Figure S27. ESIMS spectrum of <b>11</b> .....                                                 | S30 |
| Figure S28. $^1\text{H}$ NMR spectrum of <b>12</b> ( $\text{CDCl}_3$ , 700 MHz).....          | S31 |
| Figure S29. $^1\text{H}$ NMR spectrum of <b>13</b> ( $\text{CDCl}_3$ , 700 MHz).....          | S32 |
| Figure S30. $^1\text{H}$ NMR spectrum of <b>14</b> ( $\text{CDCl}_3$ , 700 MHz).....          | S33 |

|                                                                                         |     |
|-----------------------------------------------------------------------------------------|-----|
| Figure S31. $^{13}\text{C}$ NMR spectrum of <b>14</b> ( $\text{CDCl}_3$ , 175 MHz)..... | S34 |
| <i>In Vitro</i> Cytotoxicity Test.....                                                  | S35 |

Figure S1.  $^1\text{H}$  NMR spectrum of **1** ( $\text{CD}_3\text{OD}$ , 700 MHz)

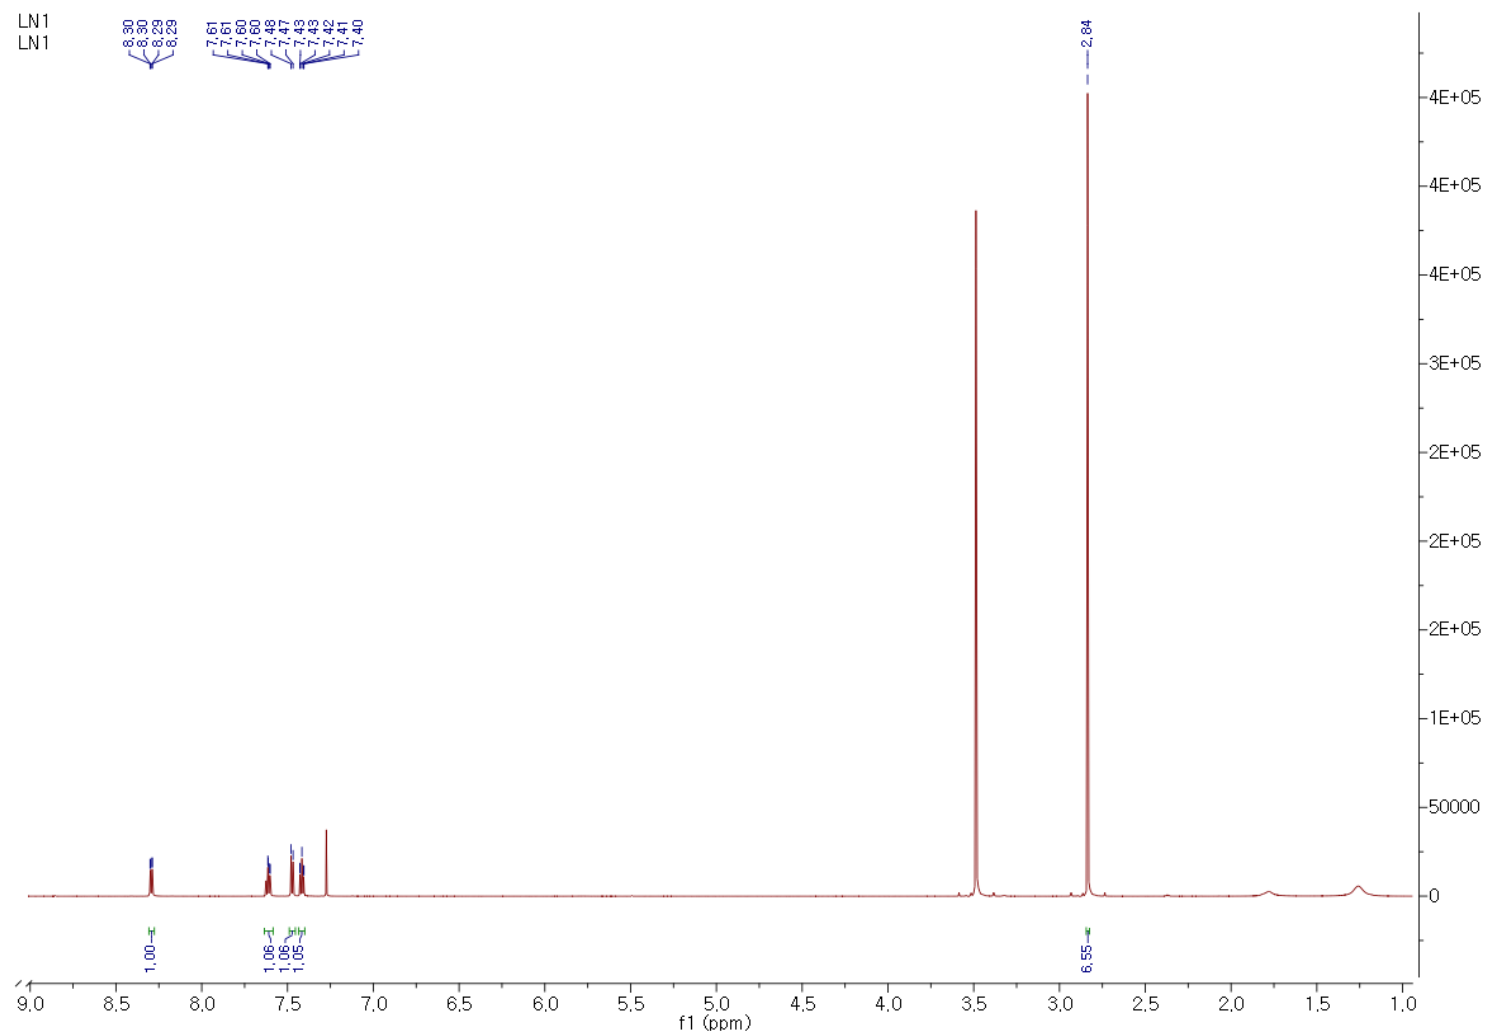

Figure S2.  $^{13}\text{C}$  NMR spectrum of **1** ( $\text{CD}_3\text{OD}$ , 175 Hz)

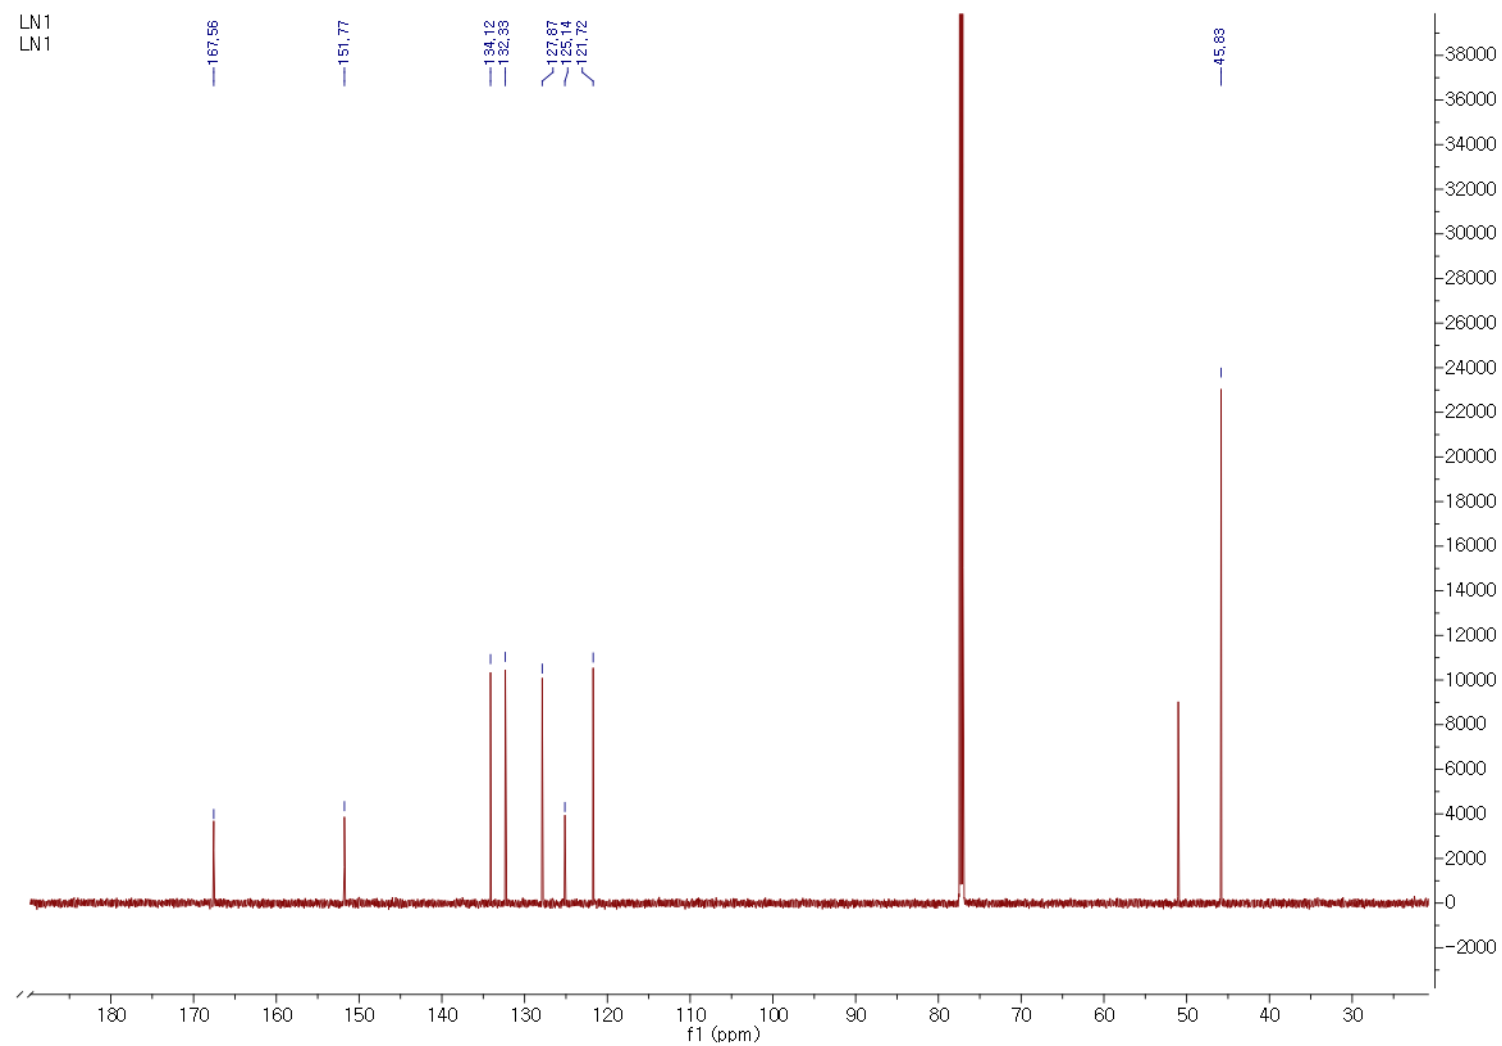

Figure S3. ESIMS spectrum of **1**

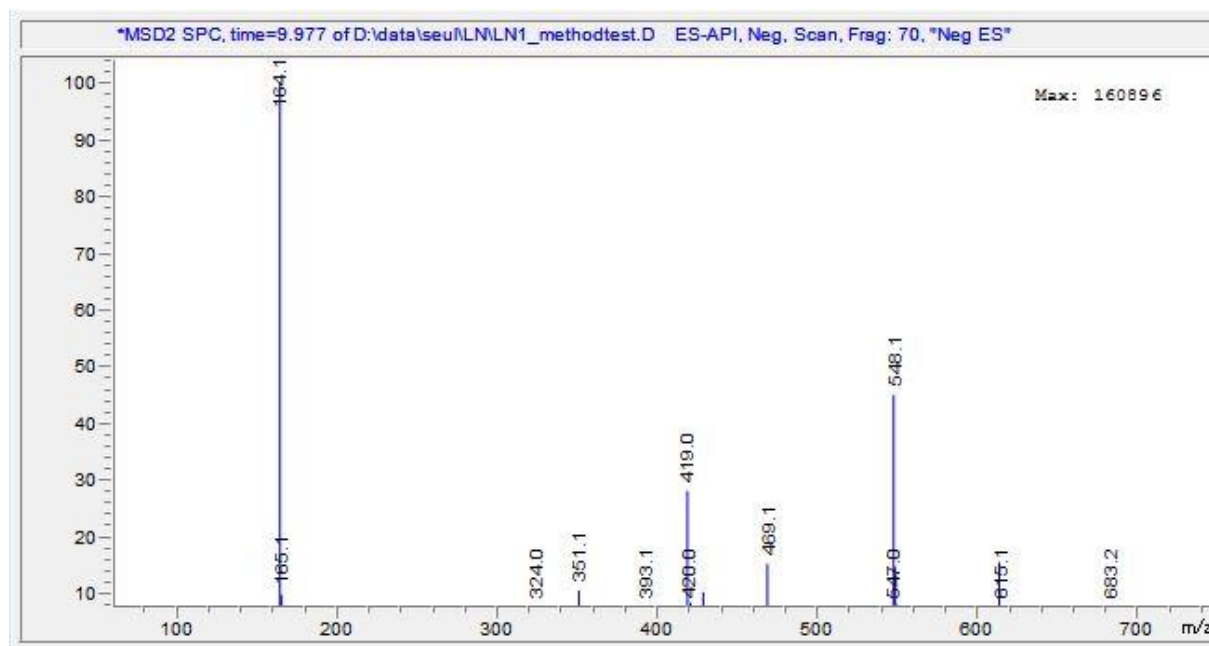

Figure S4.  $^1\text{H}$  NMR spectrum of **2** ( $\text{CD}_3\text{OD}$ , 700 MHz)

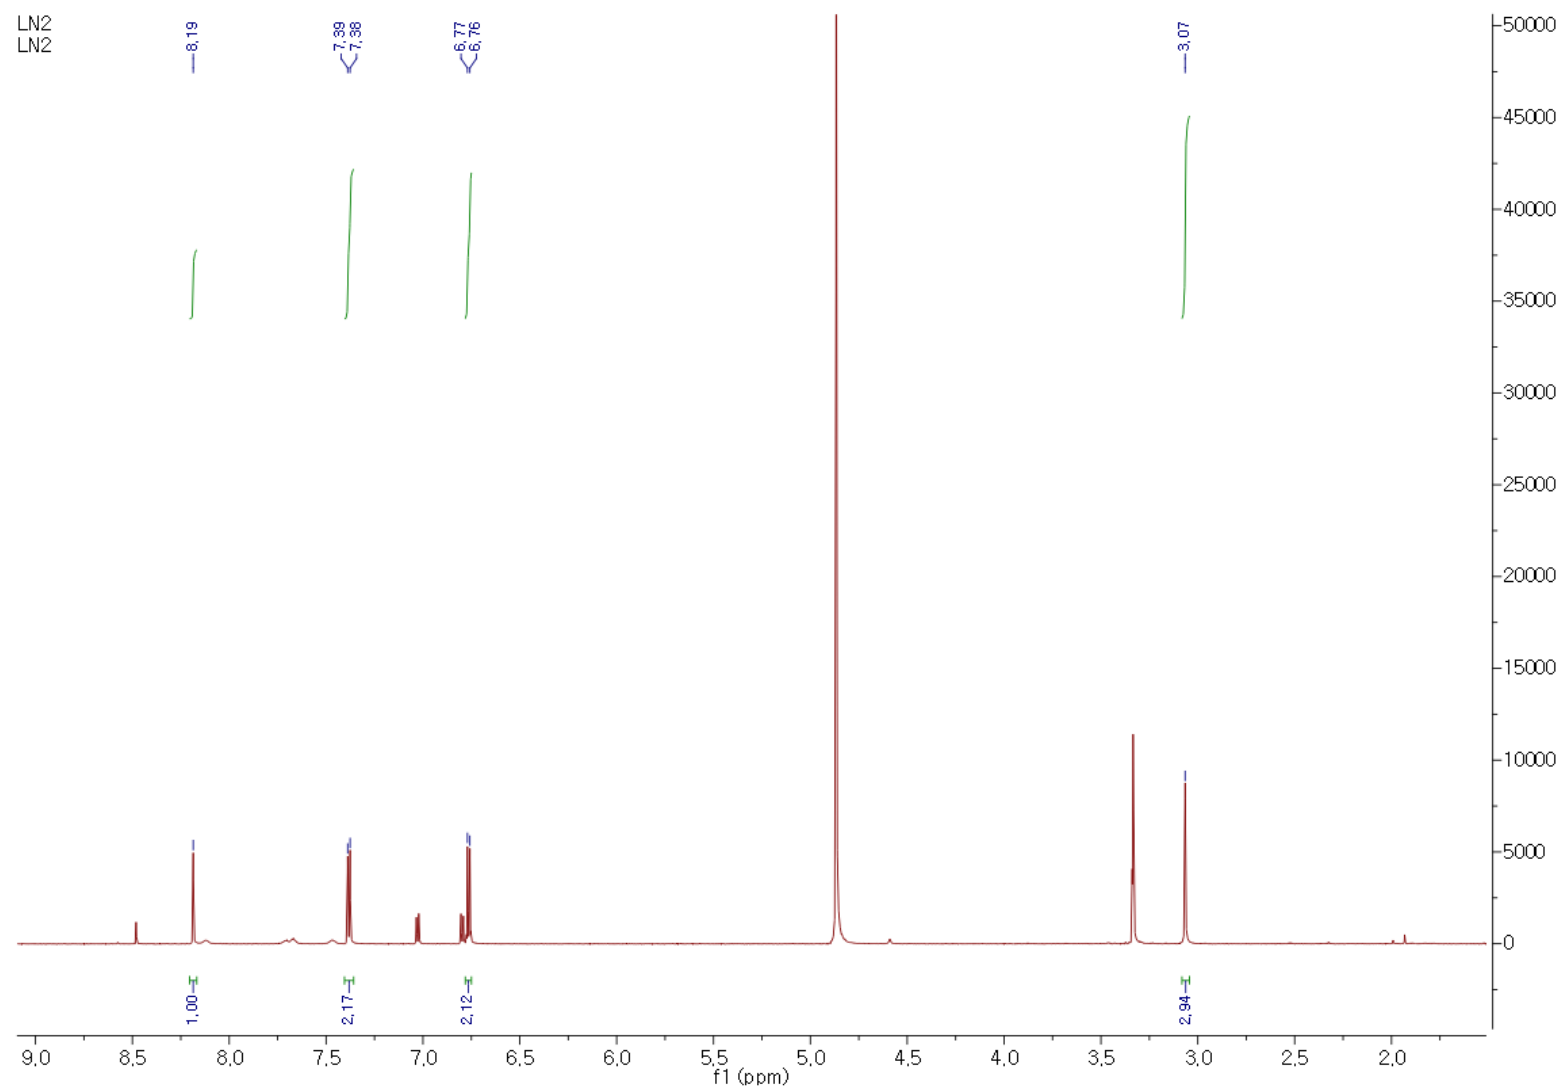

Figure S5.  $^{13}\text{C}$  NMR spectrum of **2** ( $\text{CD}_3\text{OD}$ , 175 MHz)

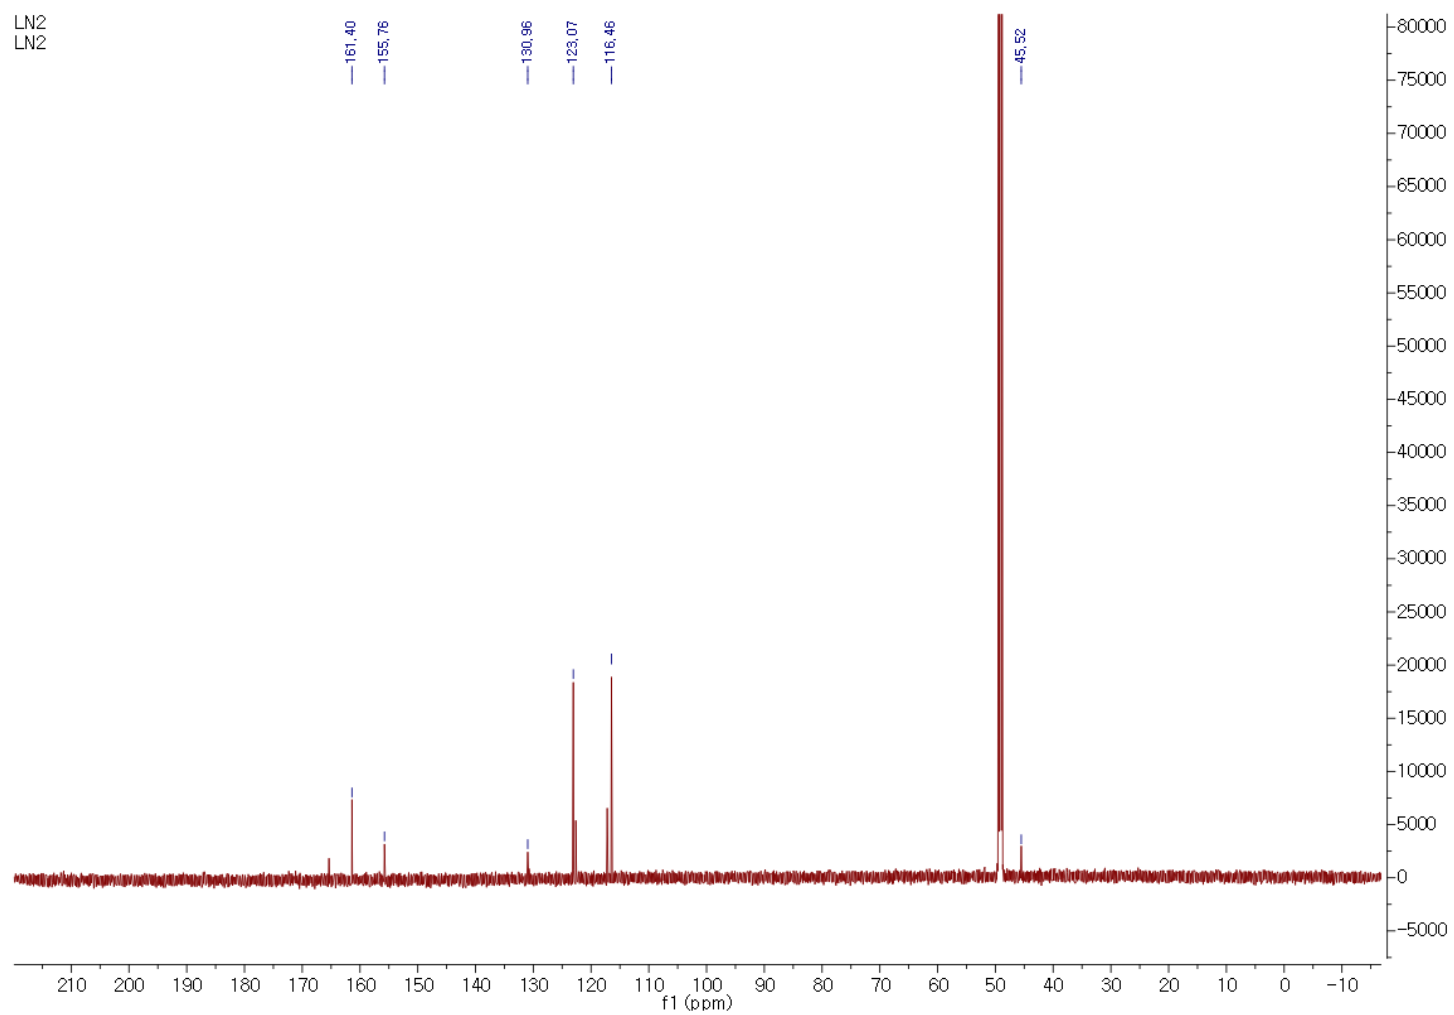



Figure S6.  $^1\text{H}$  NMR spectrum of **3** ( $\text{CD}_3\text{OD}$ , 700 MHz)

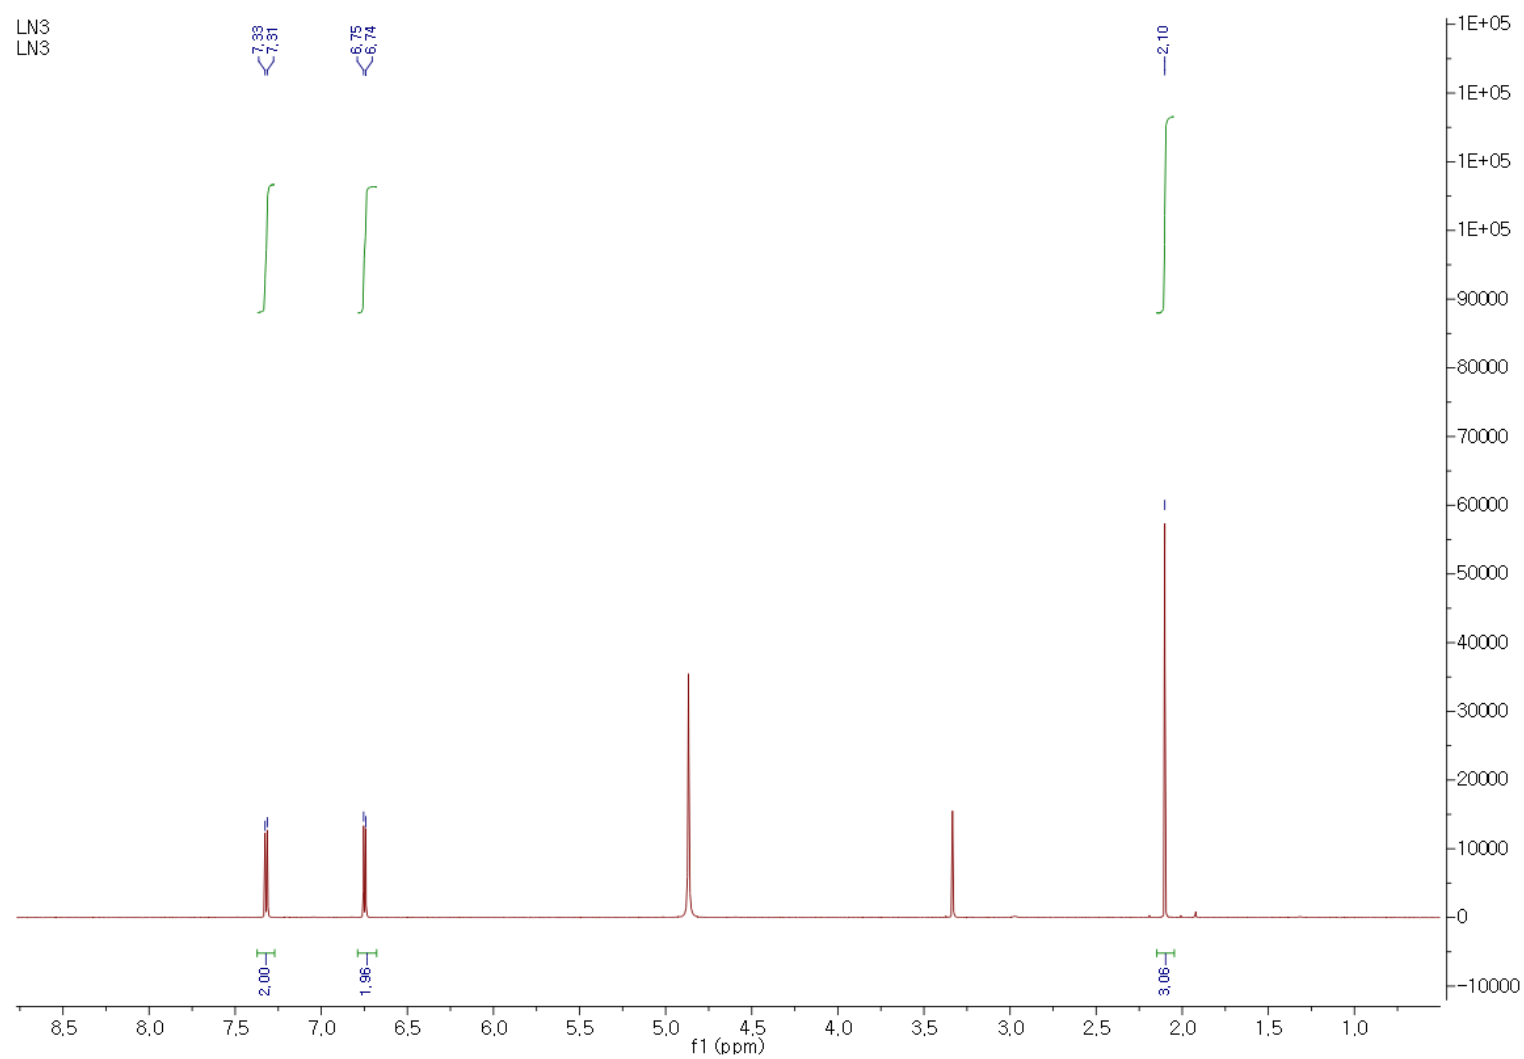

Figure S7.  $^{13}\text{C}$  NMR spectrum of **3** ( $\text{CD}_3\text{OD}$ , 175 MHz)

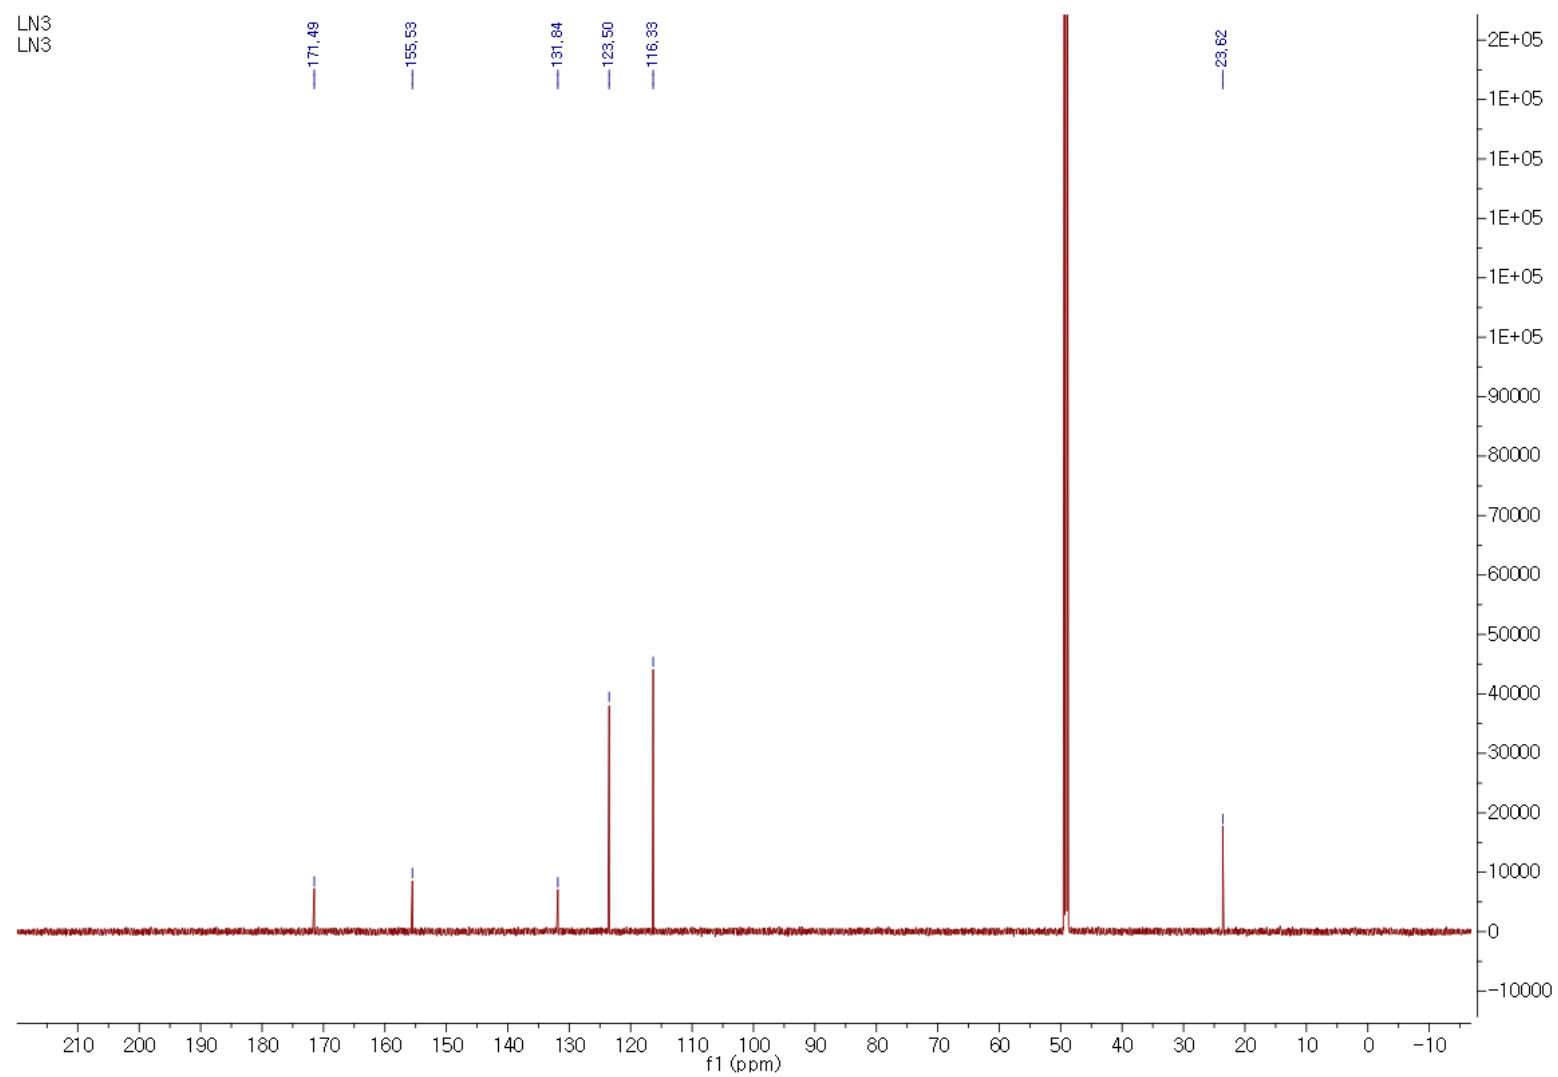

Figure S8. ESIMS spectrum of **3**

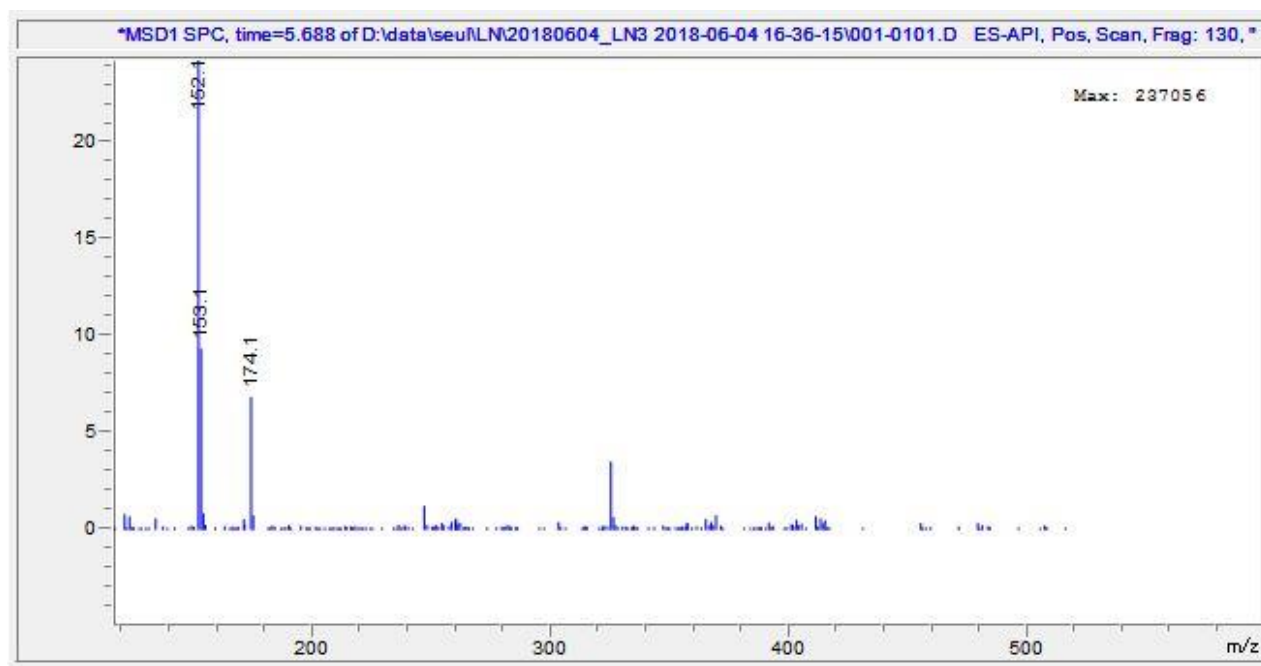

Figure S9.  $^1\text{H}$  NMR spectrum of **4** ( $\text{CD}_3\text{OD}$ , 700 MHz)

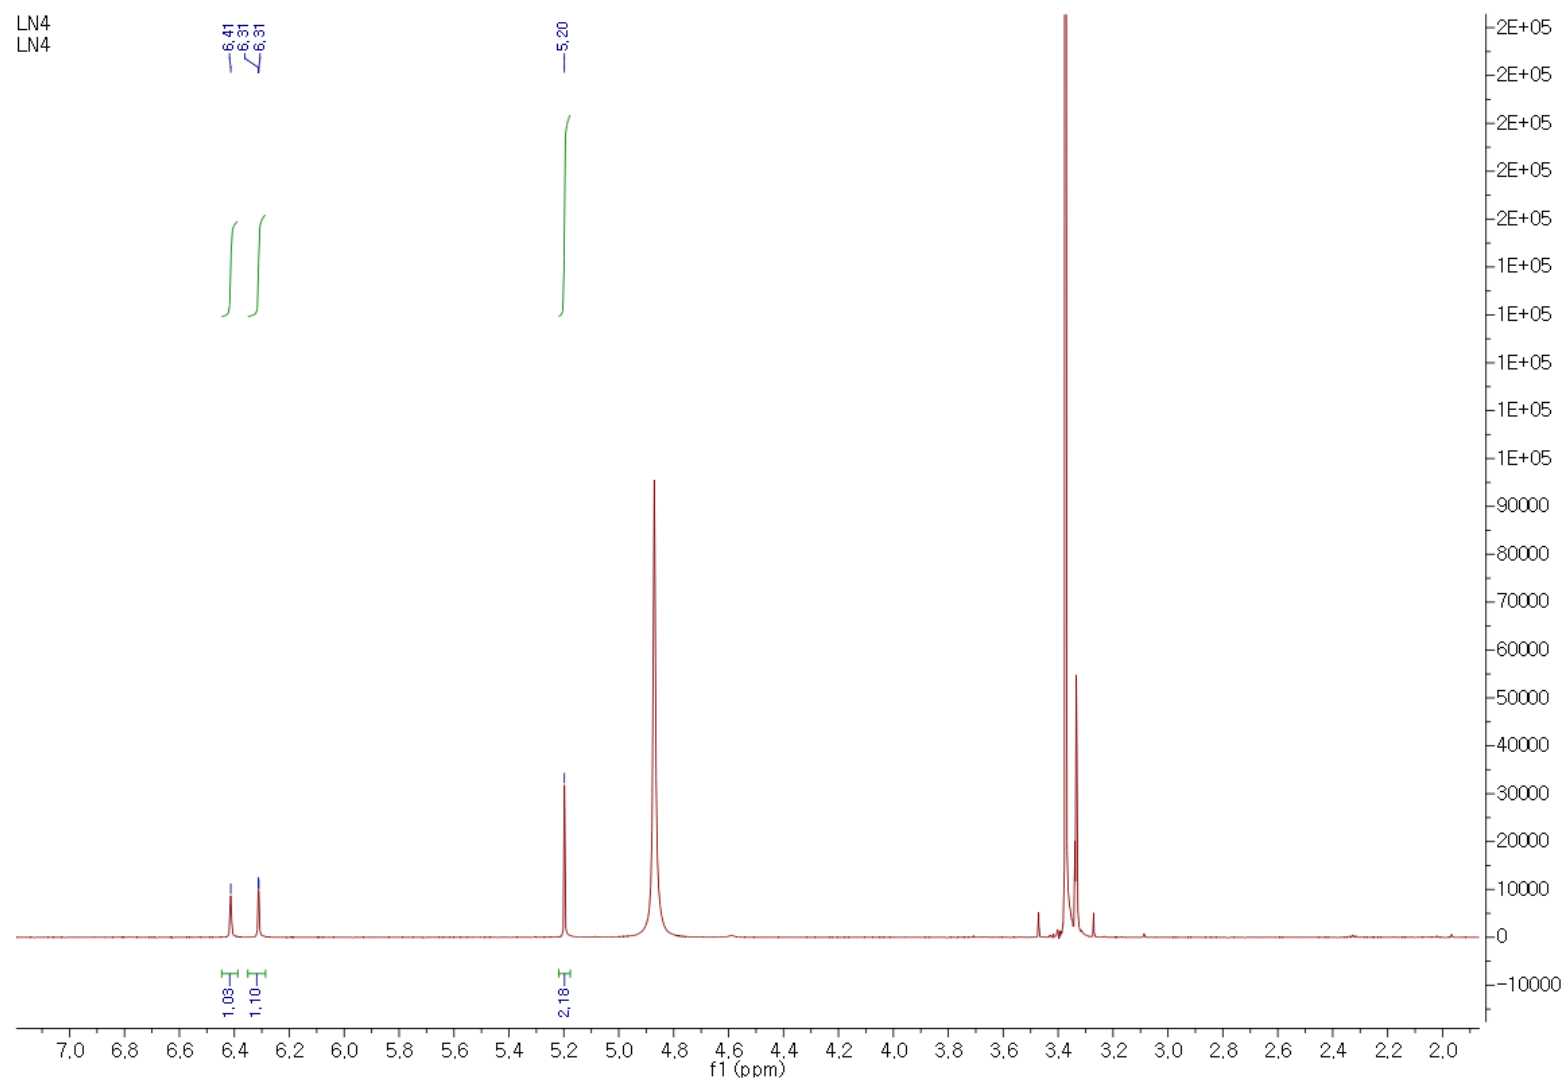

Figure S10.  $^{13}\text{C}$  NMR spectrum of **4** ( $\text{CD}_3\text{OD}$ , 175 MHz)

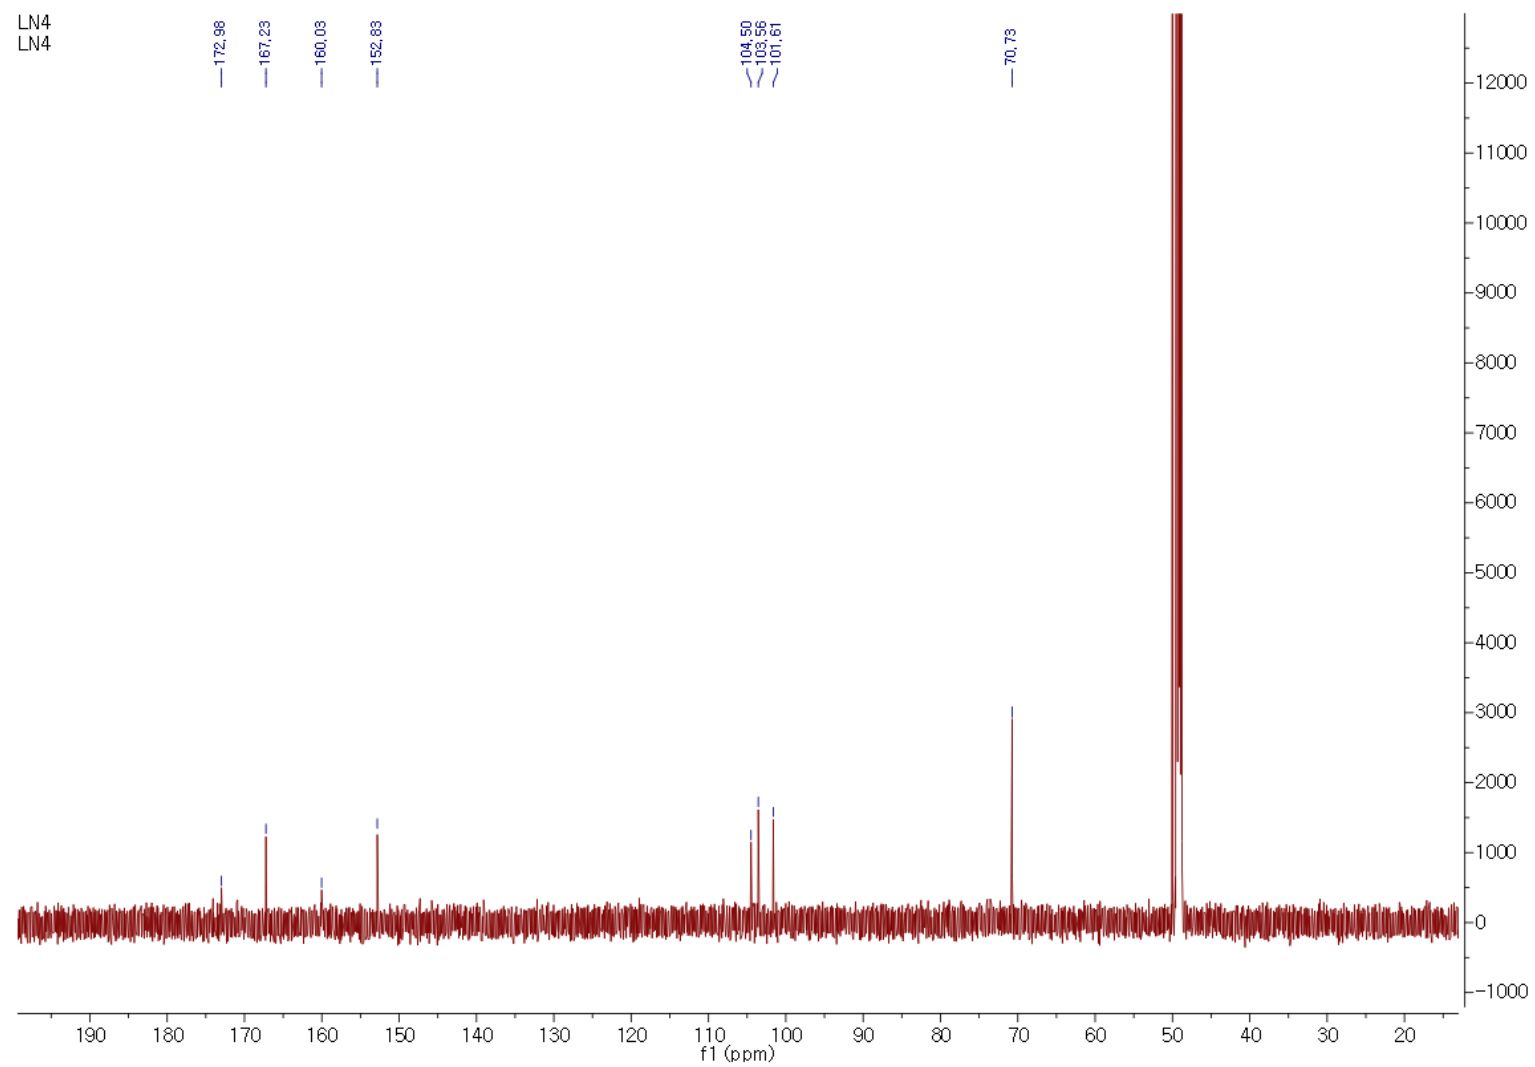

Figure S11. ESIMS spectrum of **4**

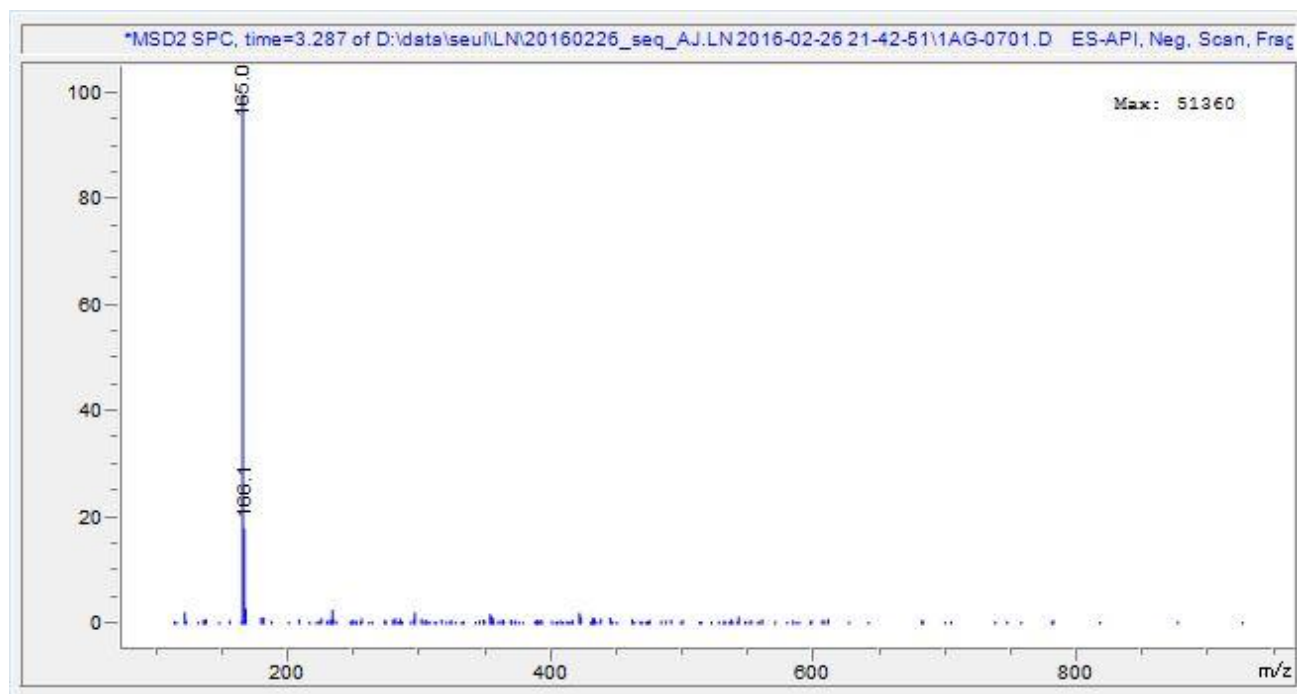

Figure S12.  $^1\text{H}$  NMR spectrum of **5** ( $\text{CDCl}_3$ , 700 MHz)

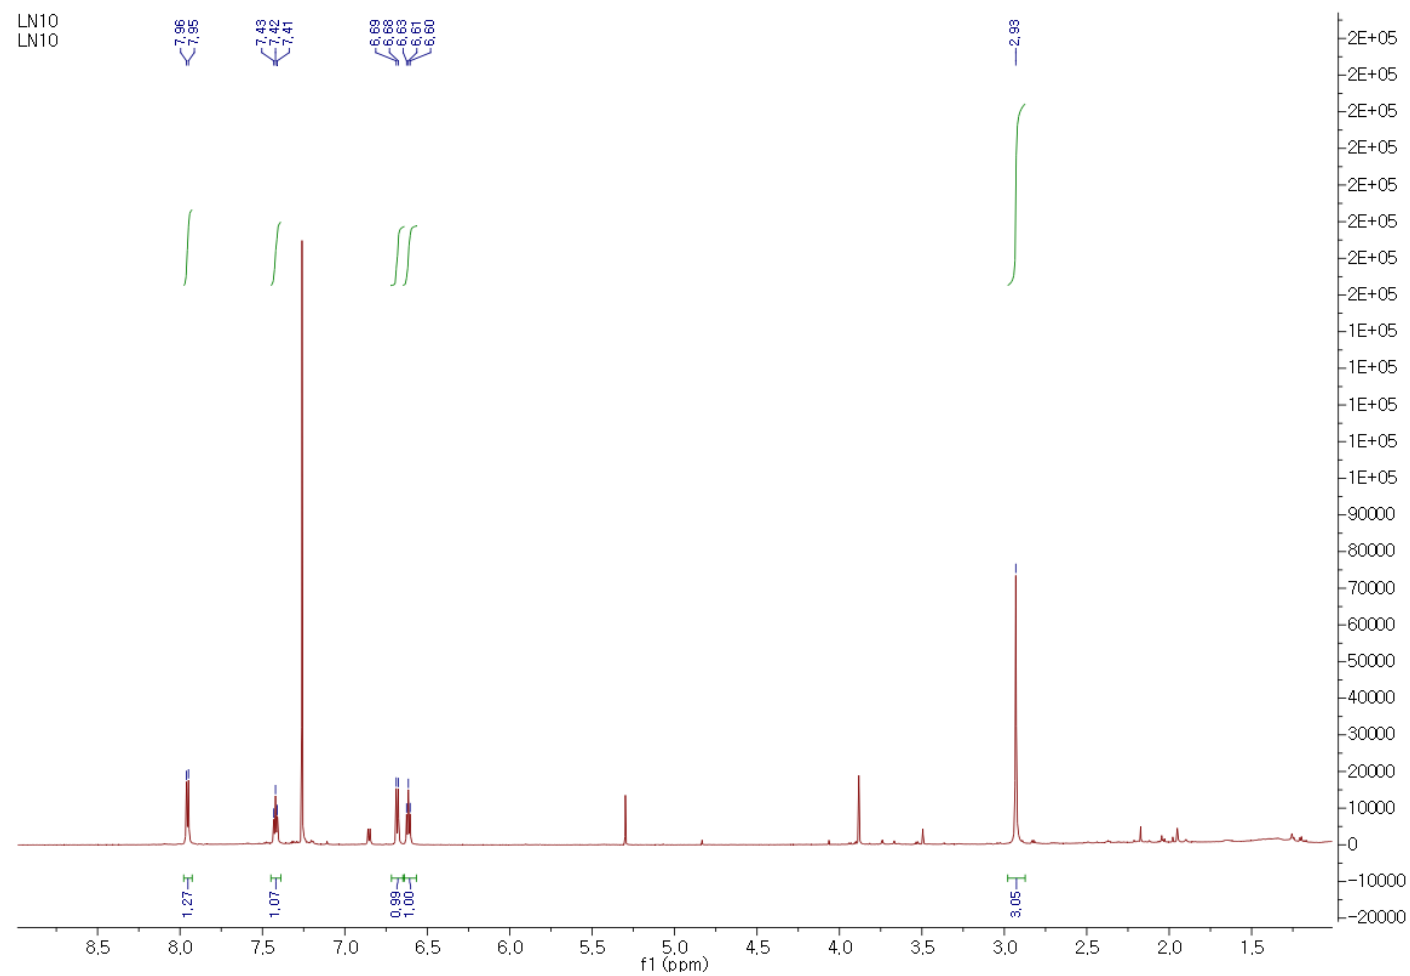

Figure S13.  $^{13}\text{C}$  NMR spectrum of **5** ( $\text{CDCl}_3$ , 175 MHz)

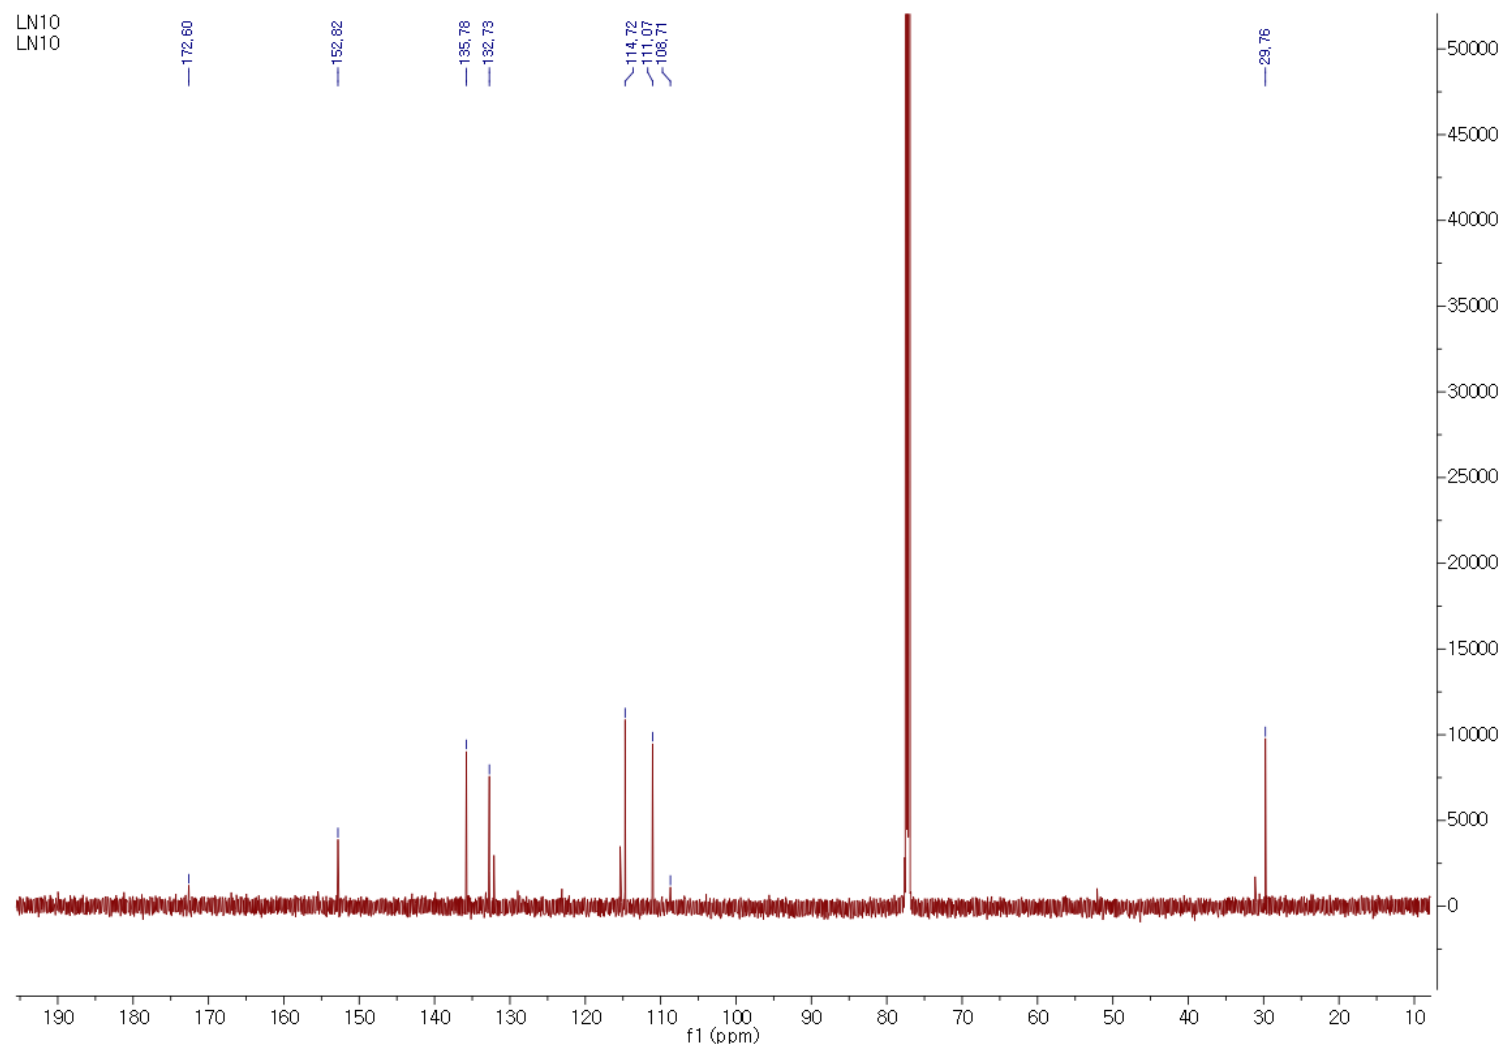



Figure S14. ESIMS spectrum of **5**

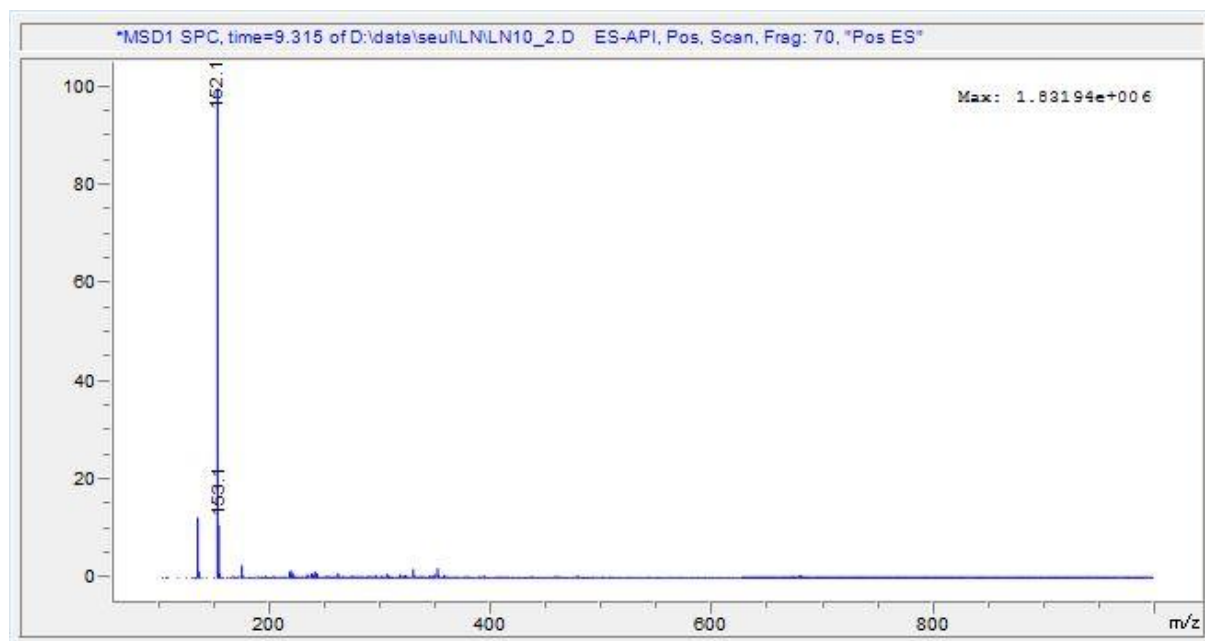

Figure S15.  $^1\text{H}$  NMR spectrum of **6** ( $\text{CD}_3\text{OD}$ , 700 MHz)

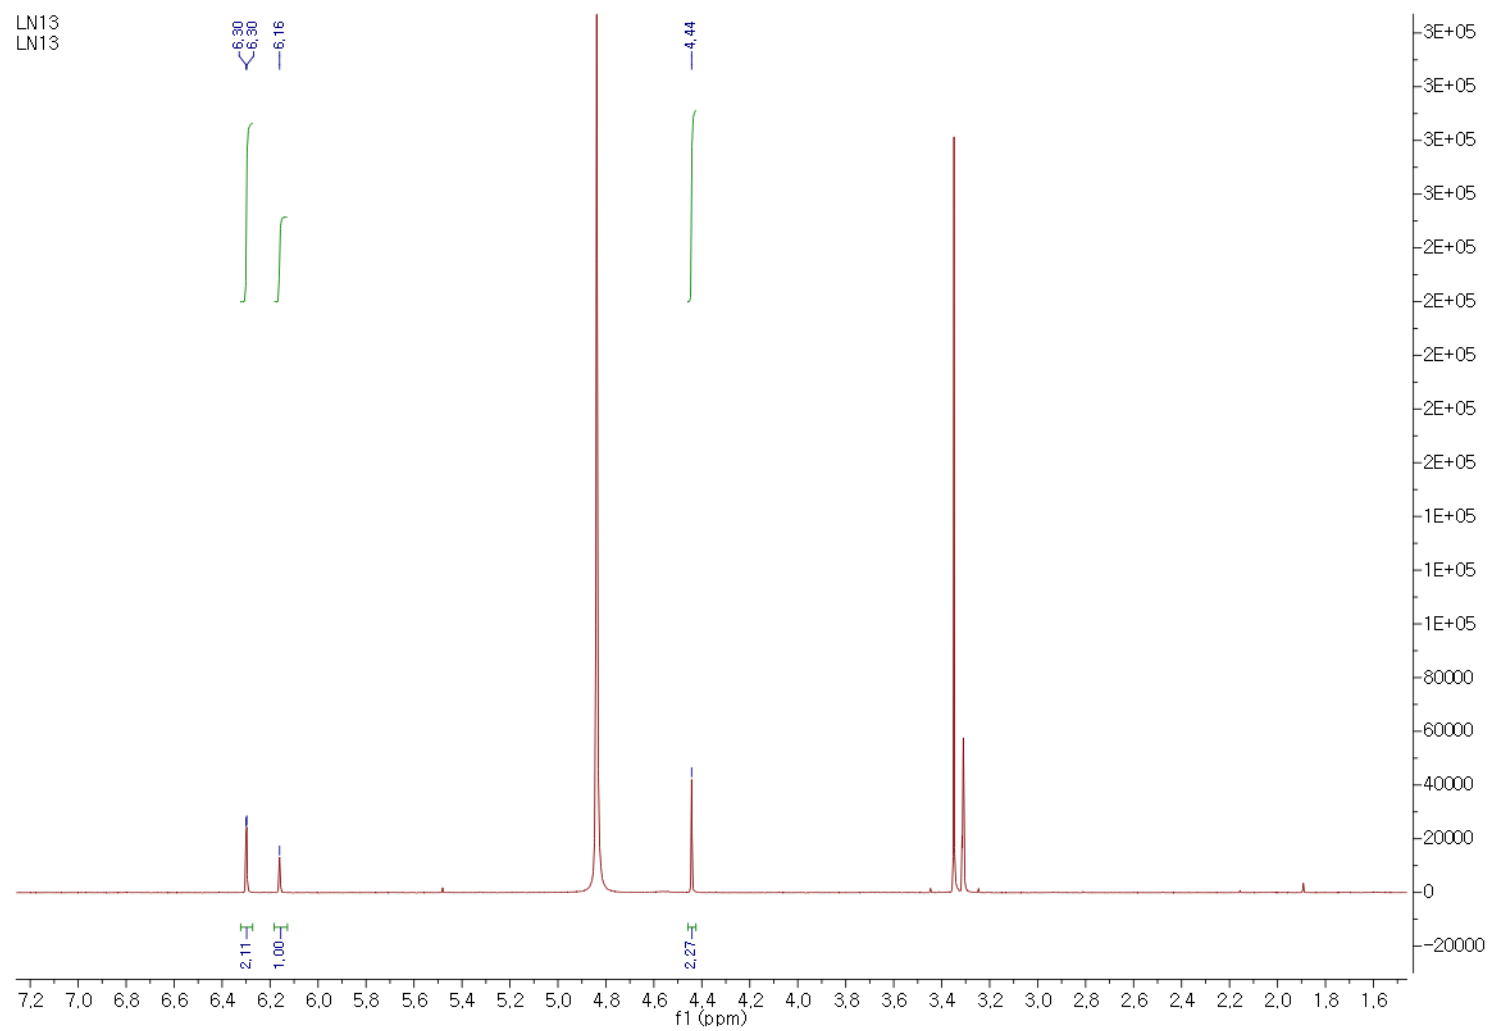

Figure S16. ESIMS spectrum of **6**

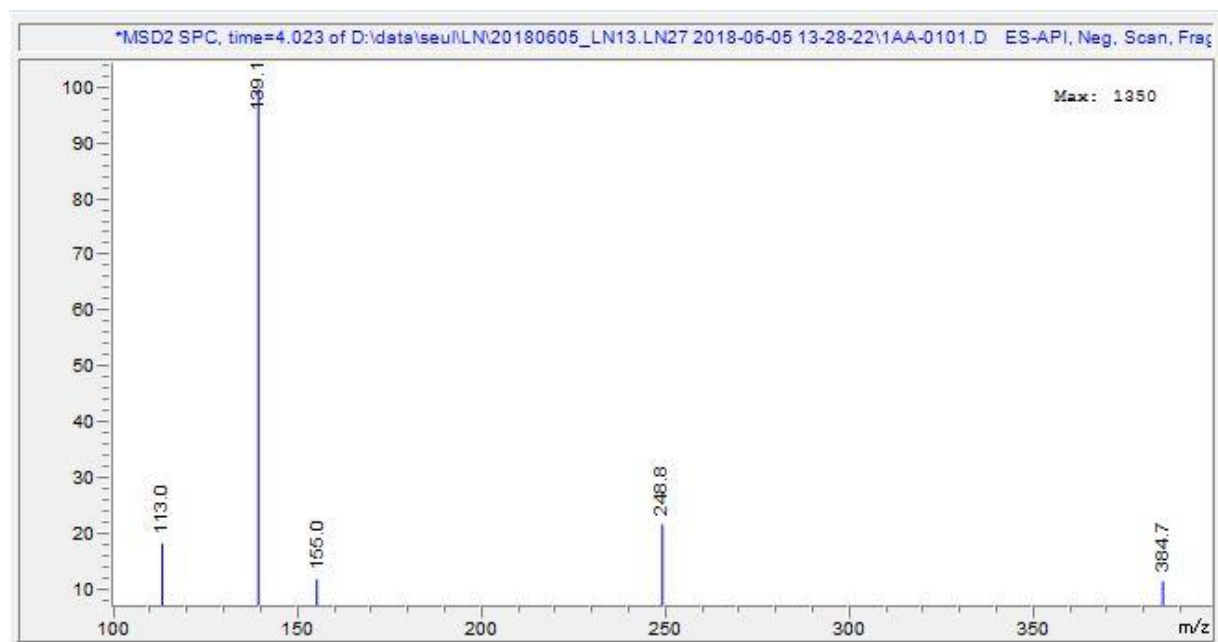

Figure S17.  $^1\text{H}$  NMR spectrum of **7** ( $\text{CDCl}_3$ , 700 MHz)

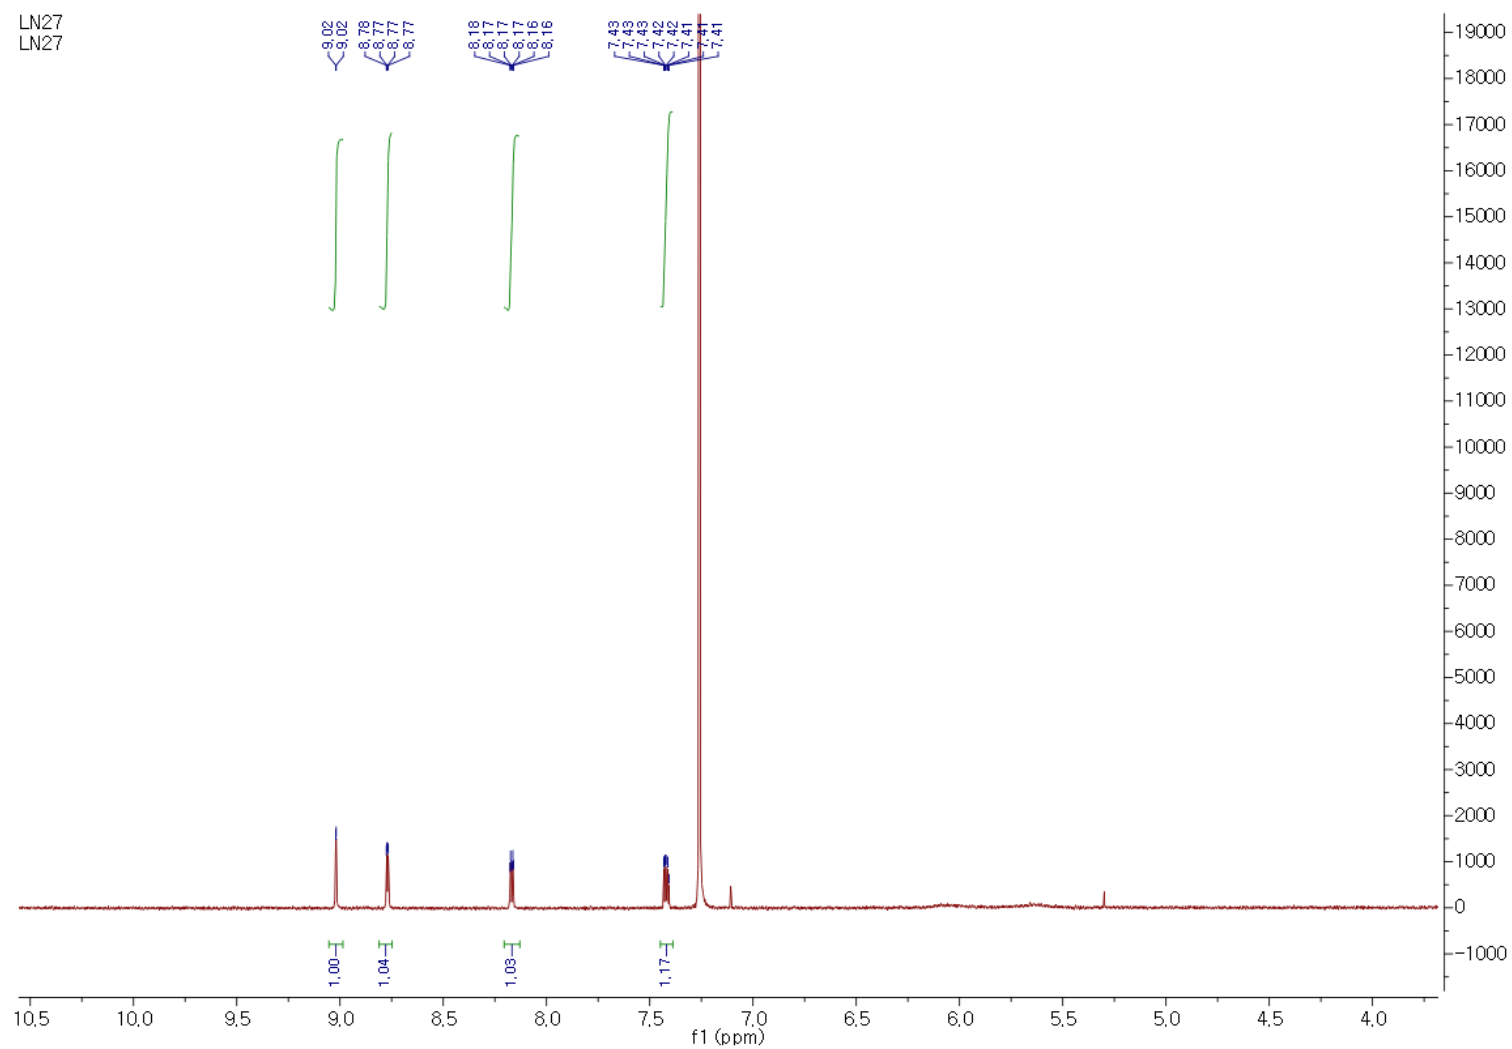

Figure S18. ESIMS spectrum of **7**

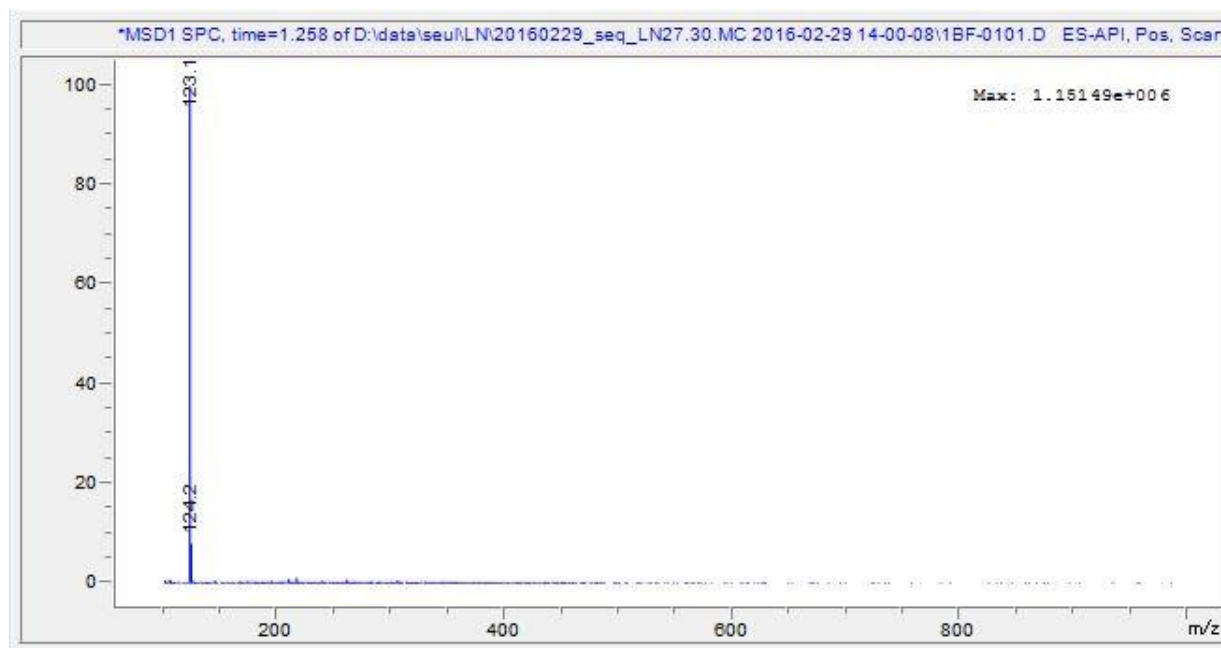

Figure S19.  $^1\text{H}$  NMR spectrum of **8** ( $\text{CD}_3\text{OD}$ , 700 MHz)

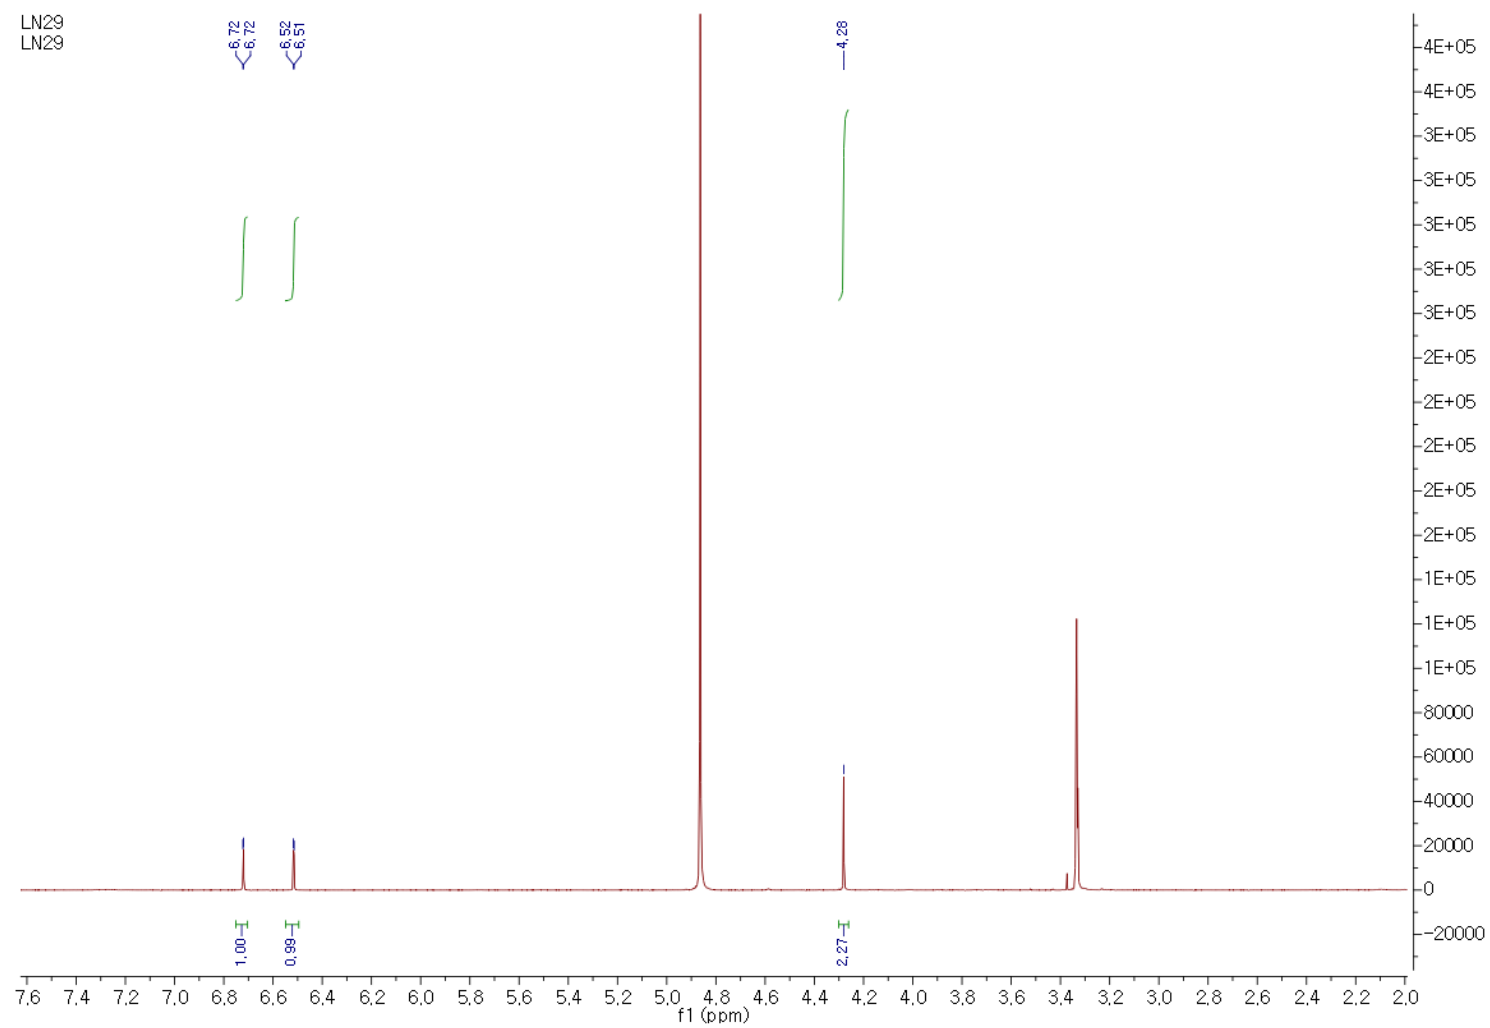

Figure S20.  $^{13}\text{C}$  NMR spectrum of **8** ( $\text{CD}_3\text{OD}$ , 175 MHz)

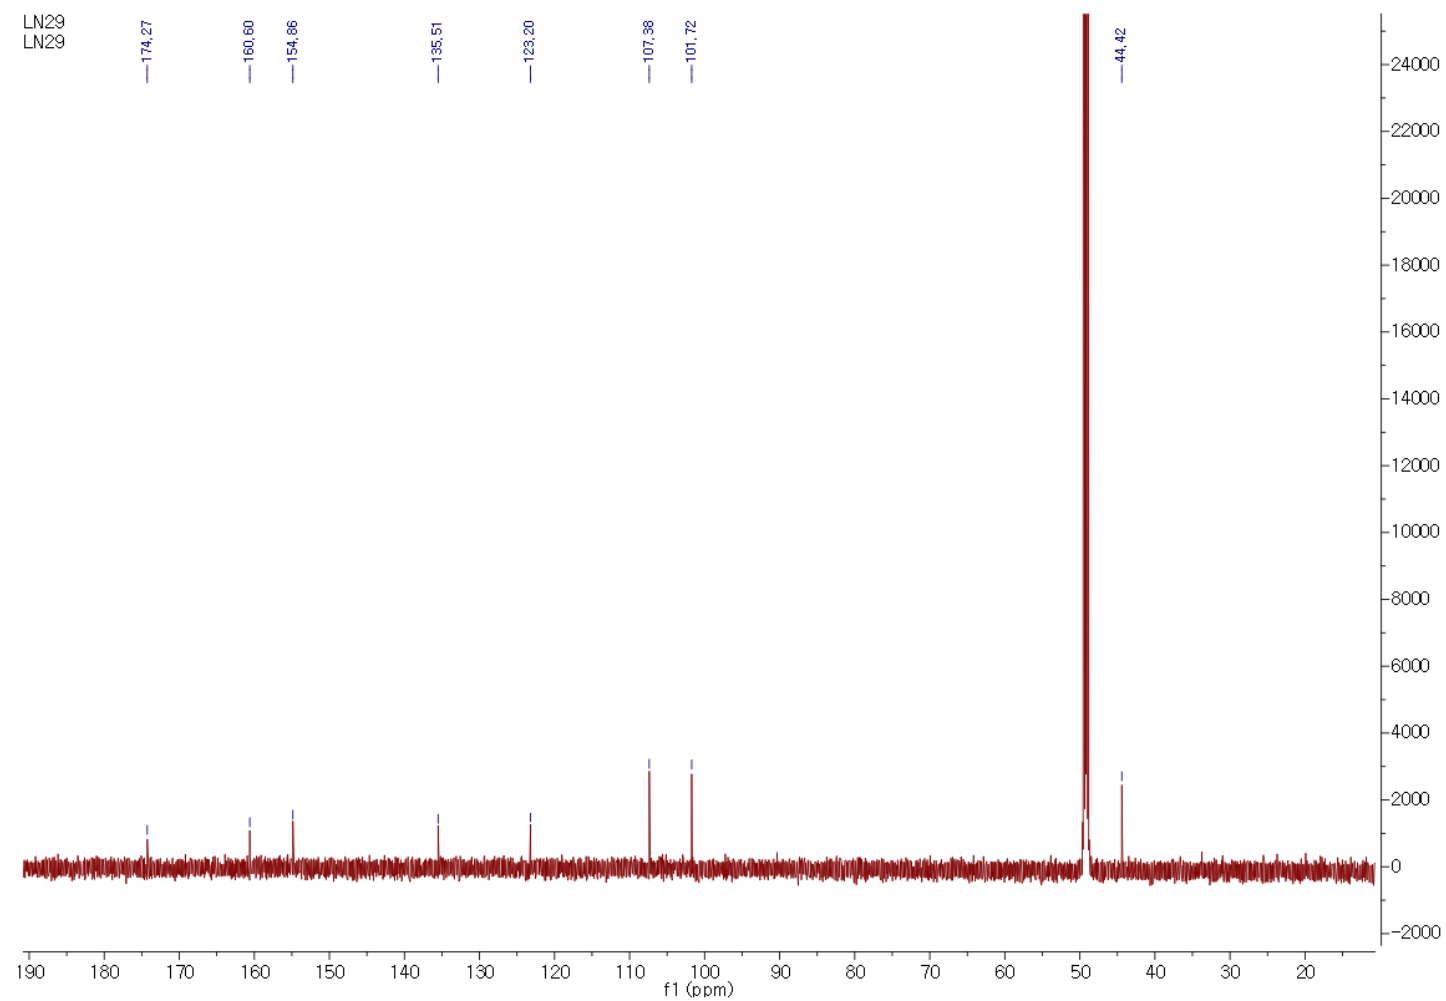

Figure S21. ESIMS spectrum of **8**

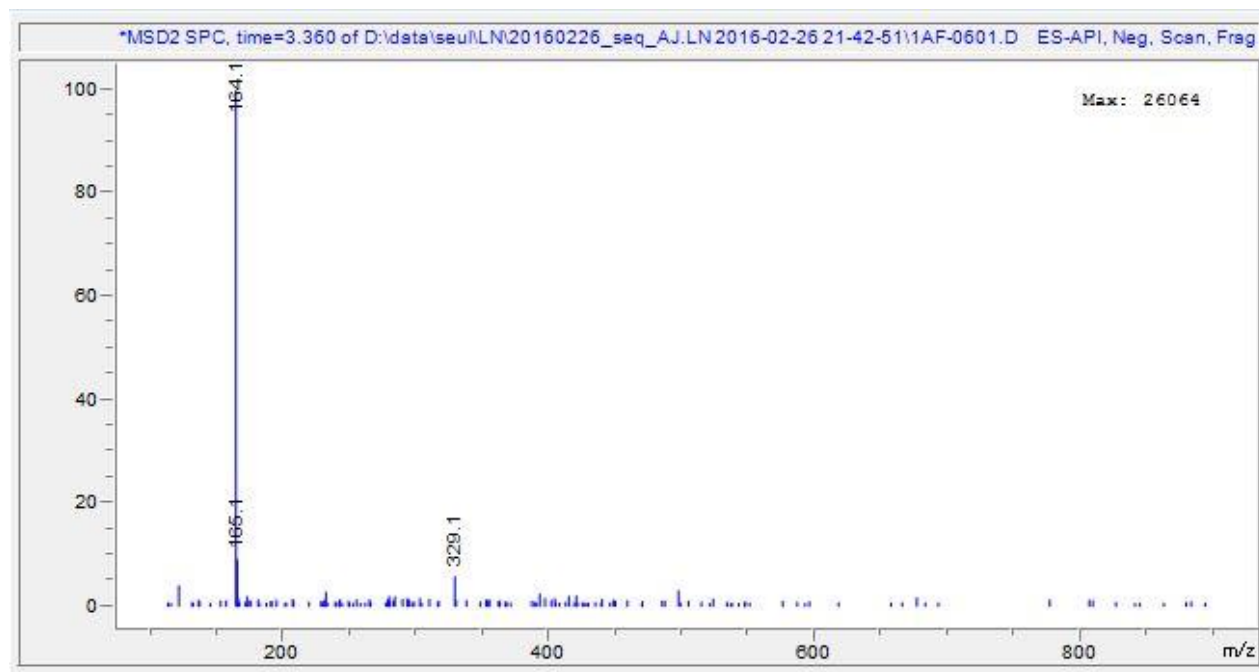



Figure S22.  $^1\text{H}$  NMR spectrum of **9** ( $\text{CDCl}_3$ , 700 MHz)

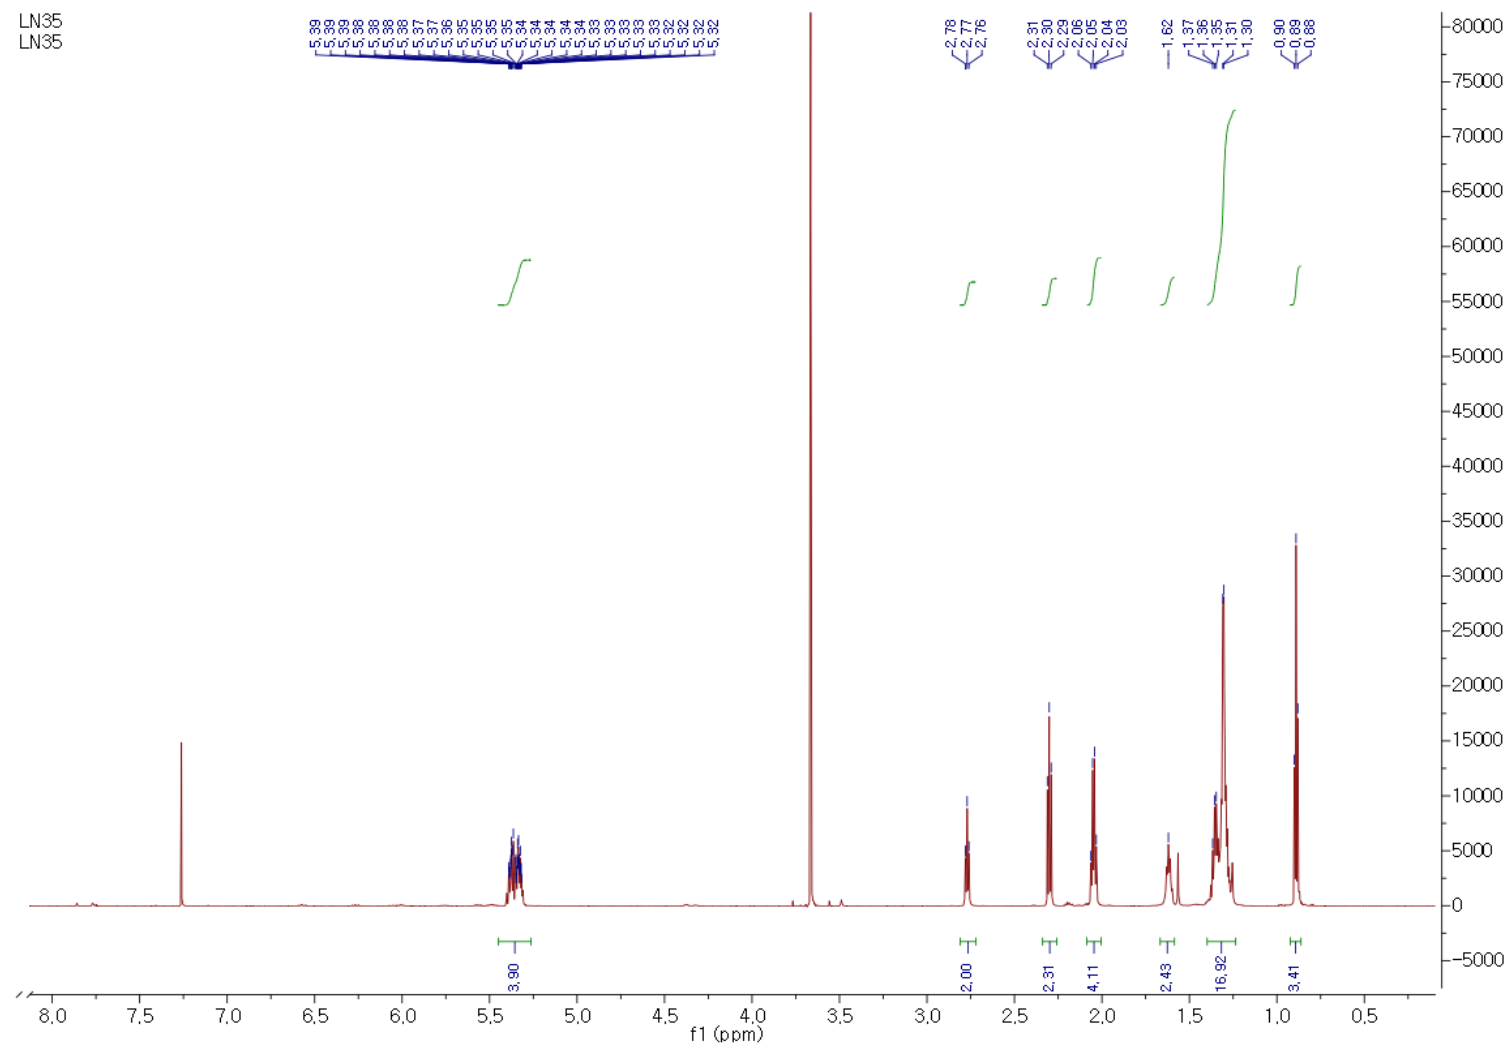

Figure S23. ESIMS spectrum of **9**

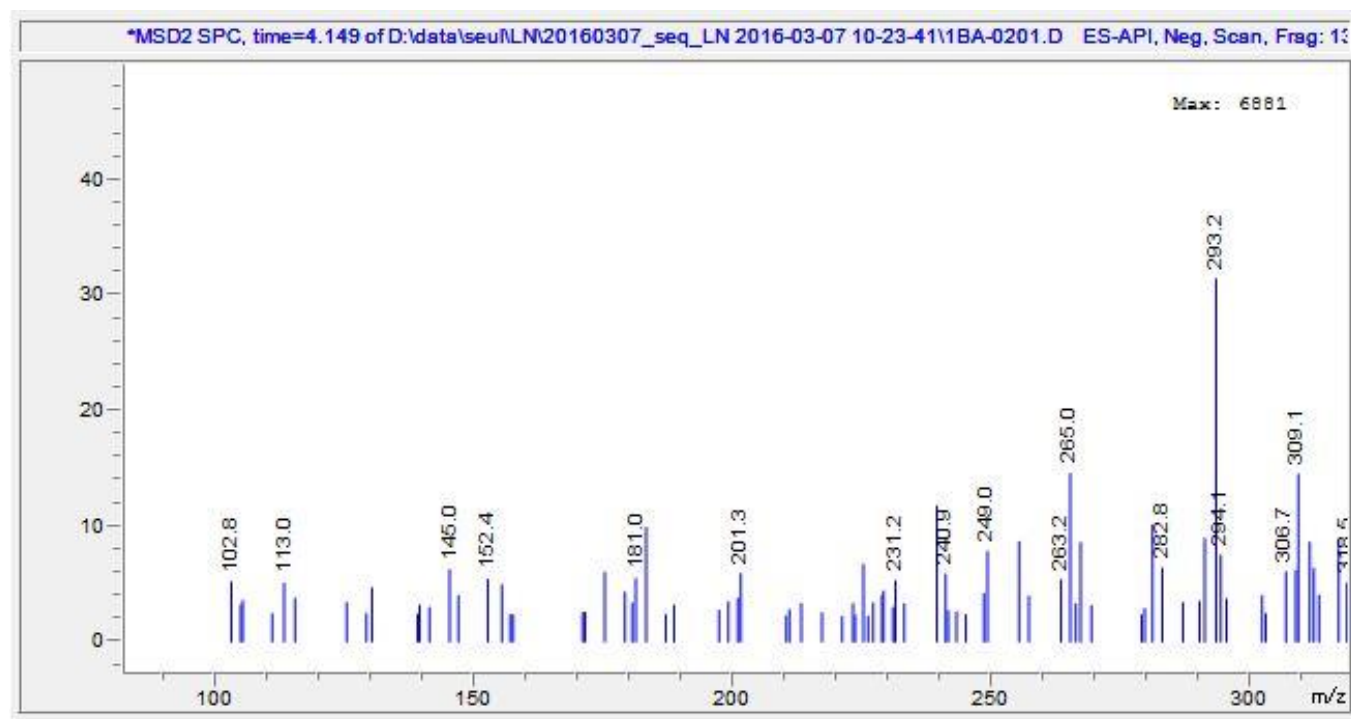

Figure S24.  $^1\text{H}$  NMR spectrum of **10** ( $\text{CDCl}_3$ , 700 MHz)

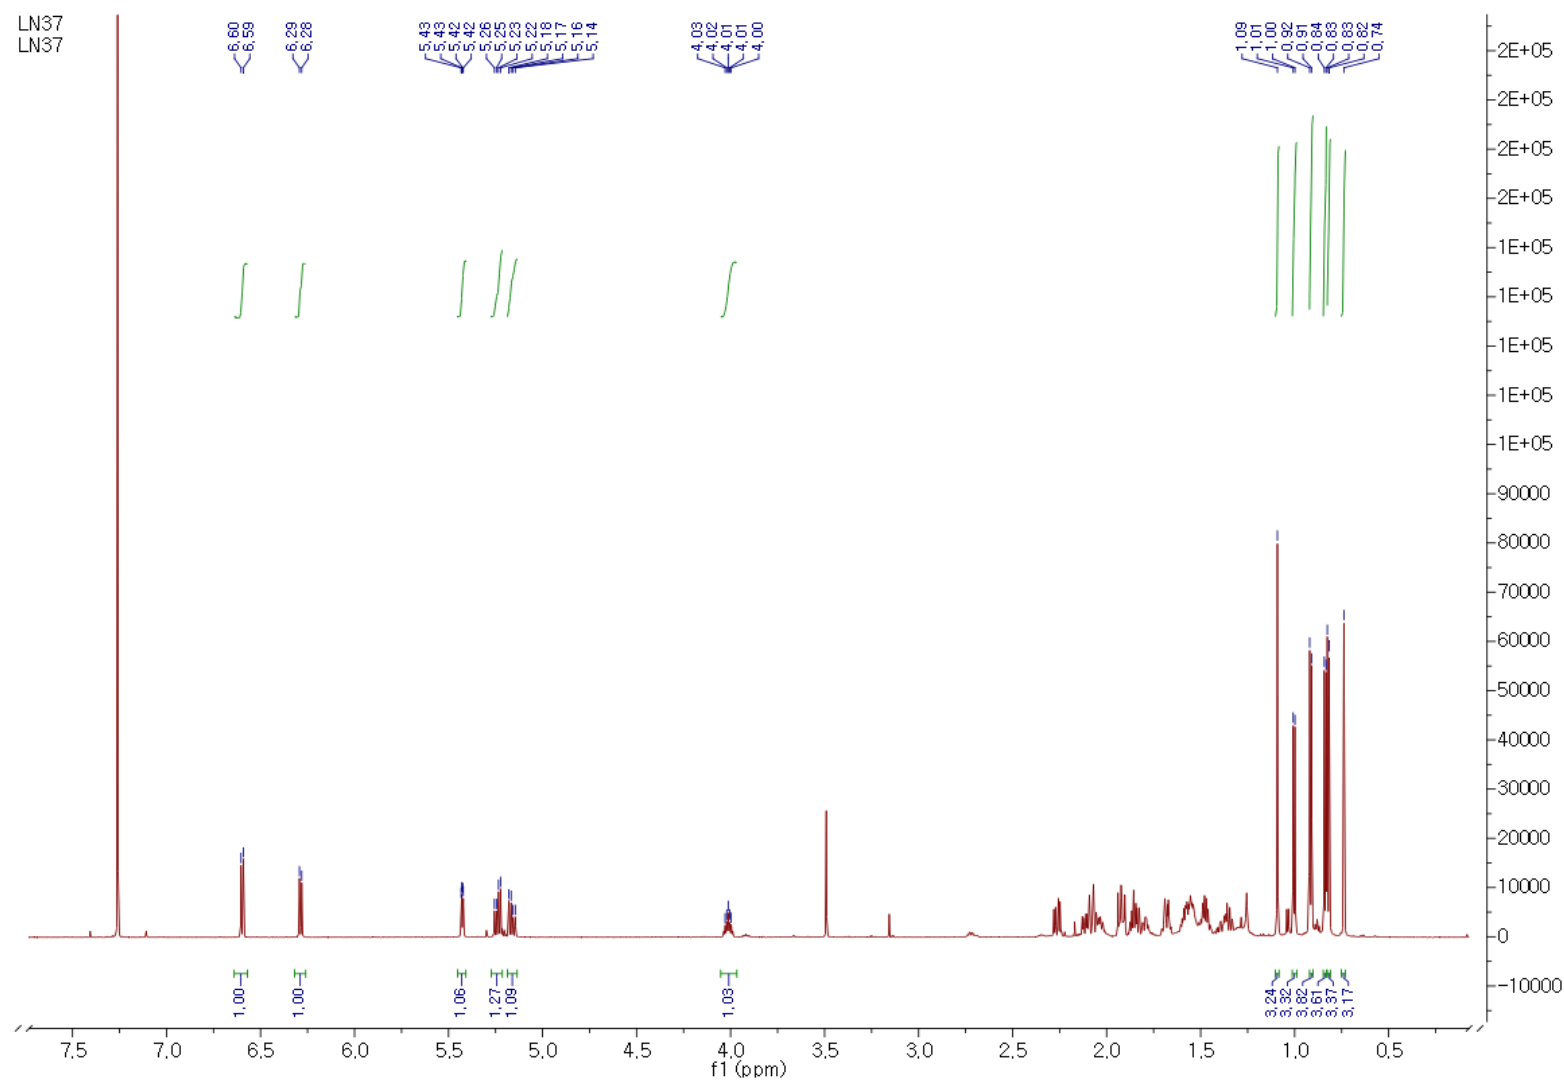

Figure S25.  $^1\text{H}$  NMR spectrum of **11** ( $\text{CDCl}_3$ , 700 MHz)

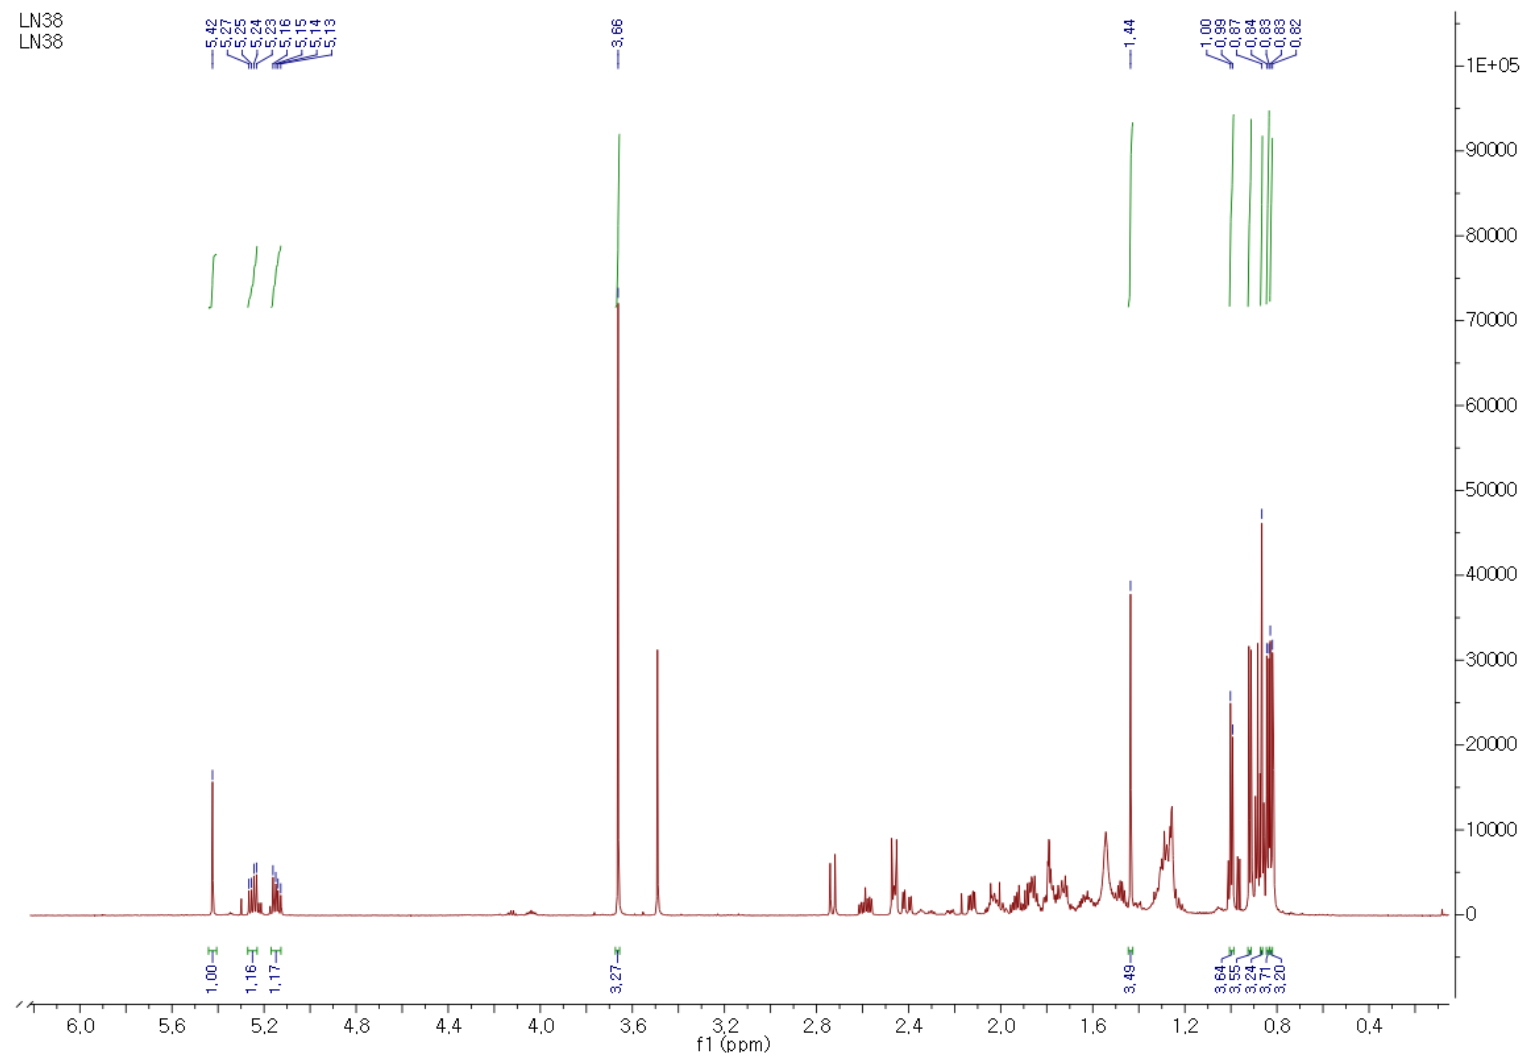

Figure S26.  $^{13}\text{C}$  NMR spectrum of **11** ( $\text{CDCl}_3$ , 175 MHz)

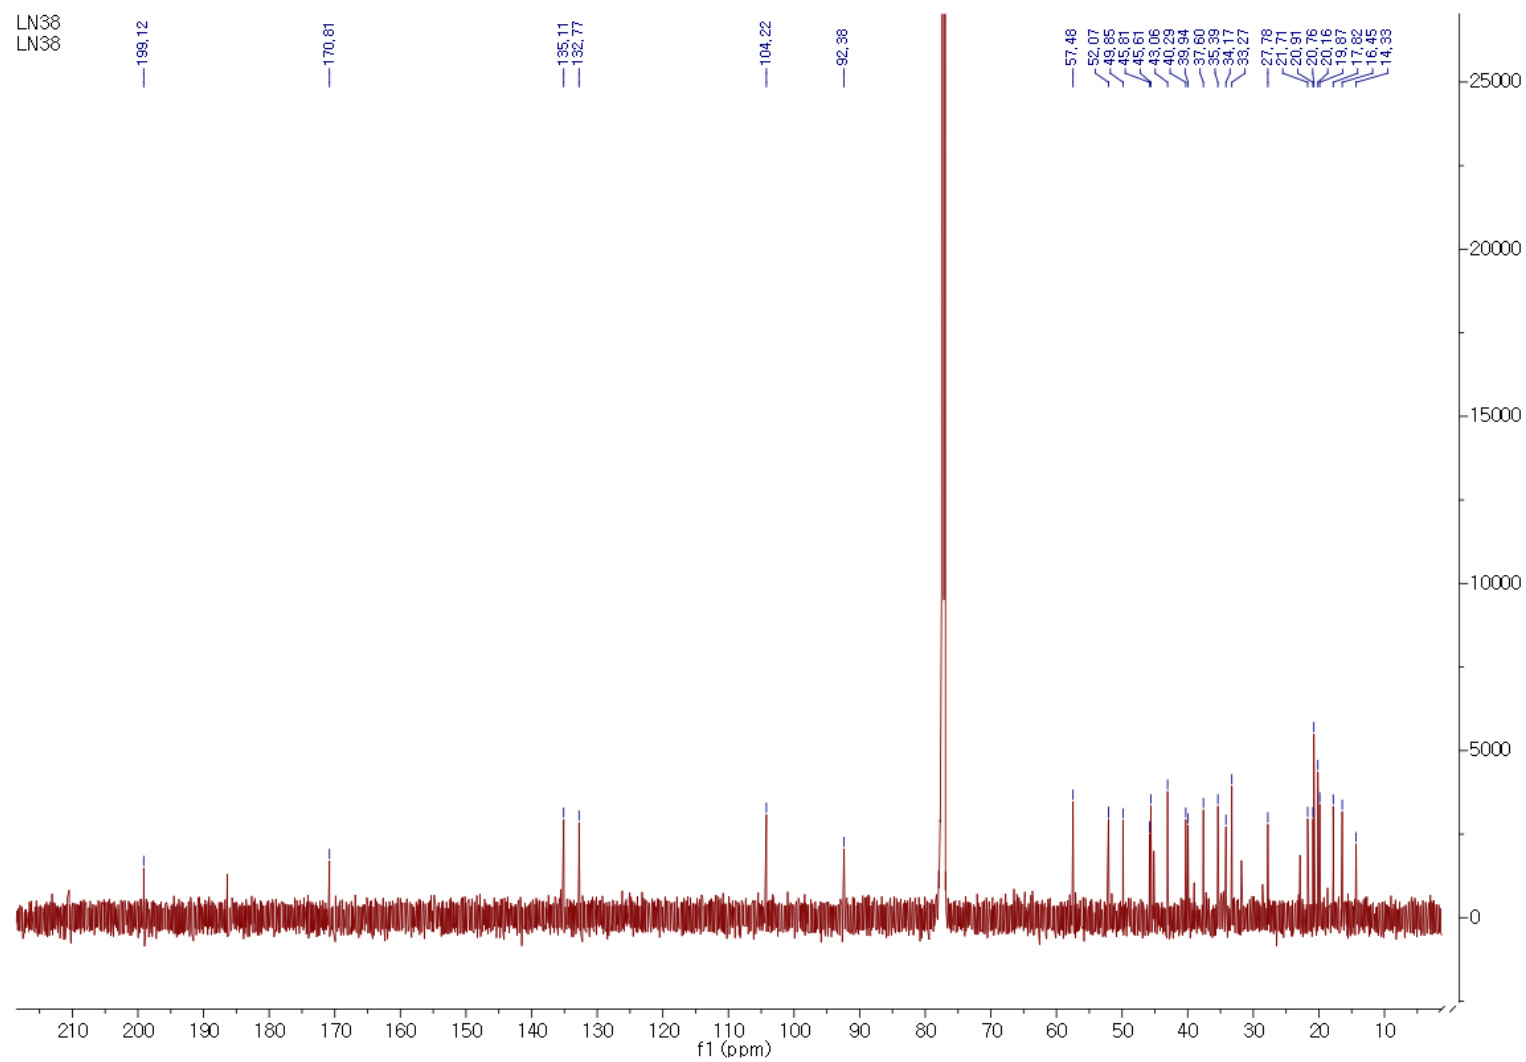

Figure S27. ESIMS spectrum of **11**

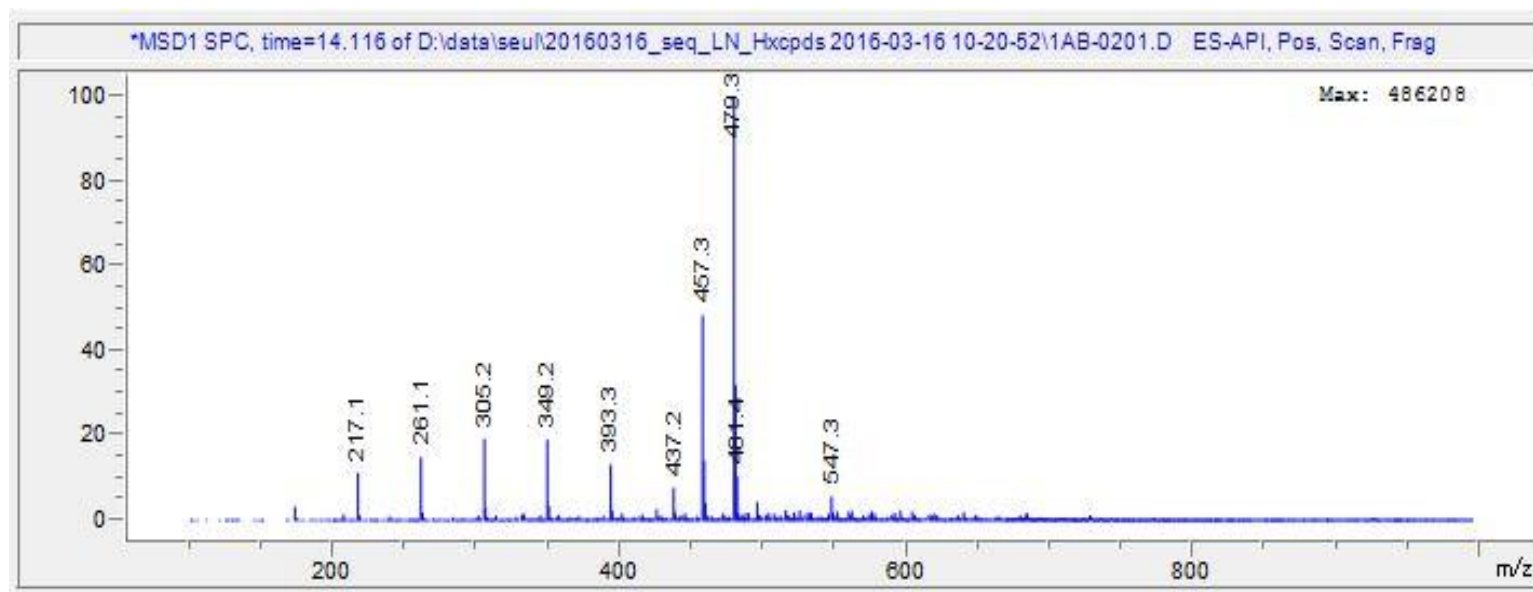

Figure S28.  $^1\text{H}$  NMR spectrum of **12** ( $\text{CDCl}_3$ , 700 MHz)

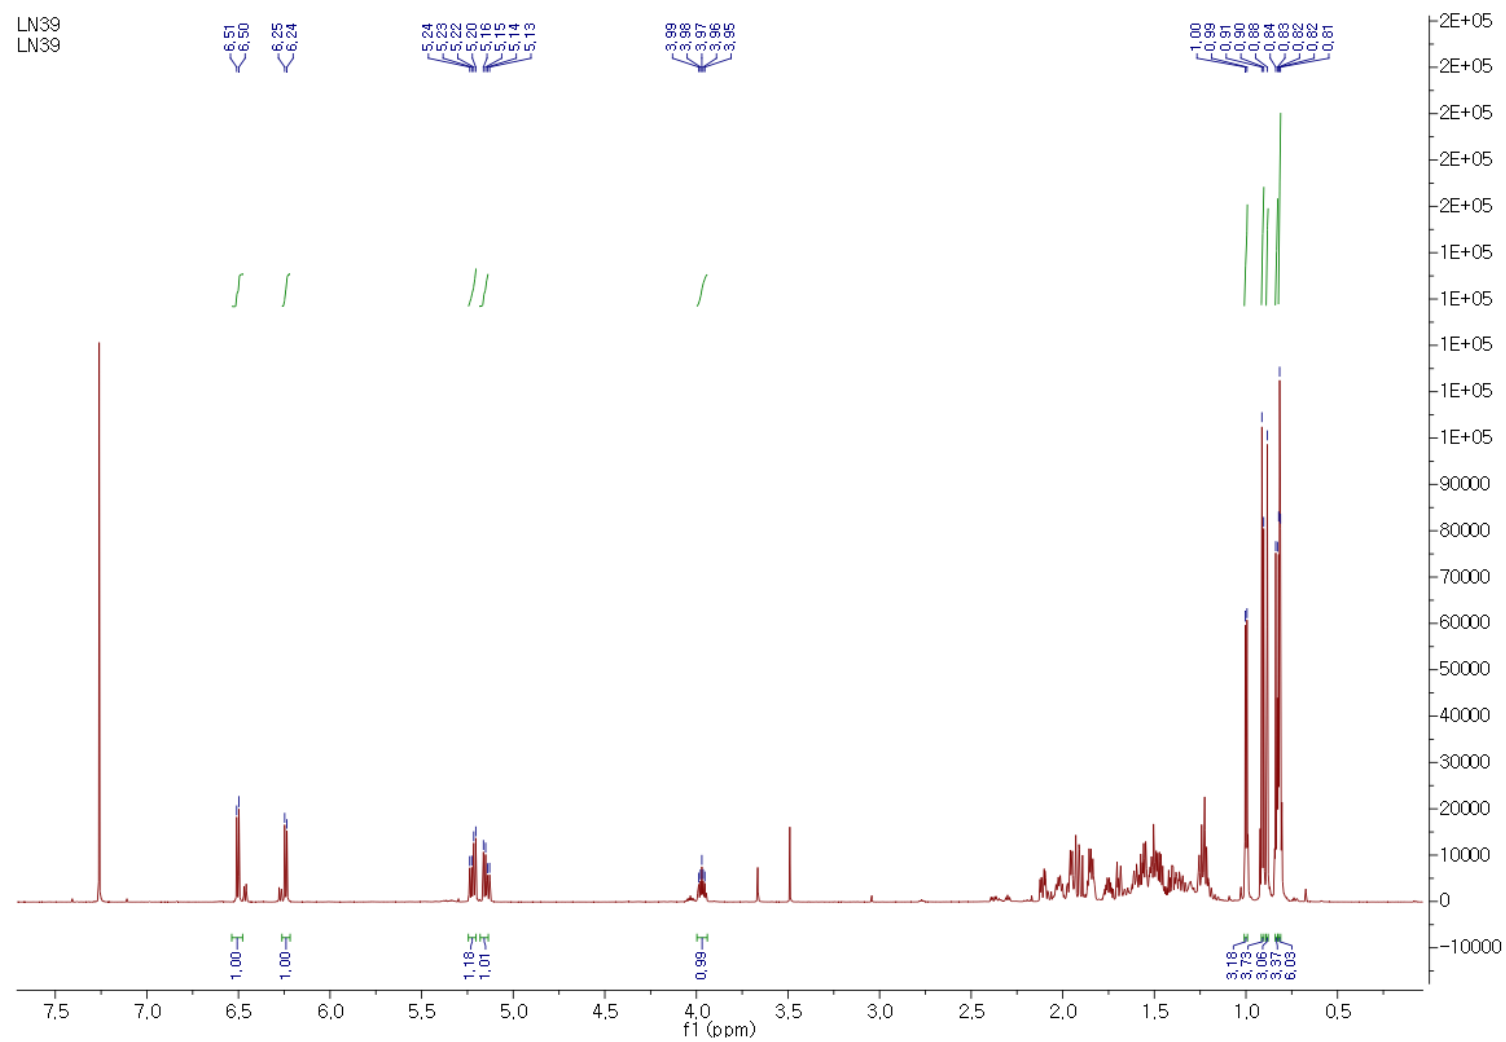

Figure S29.  $^1\text{H}$  NMR spectrum of **13** ( $\text{CDCl}_3$ , 700 MHz)

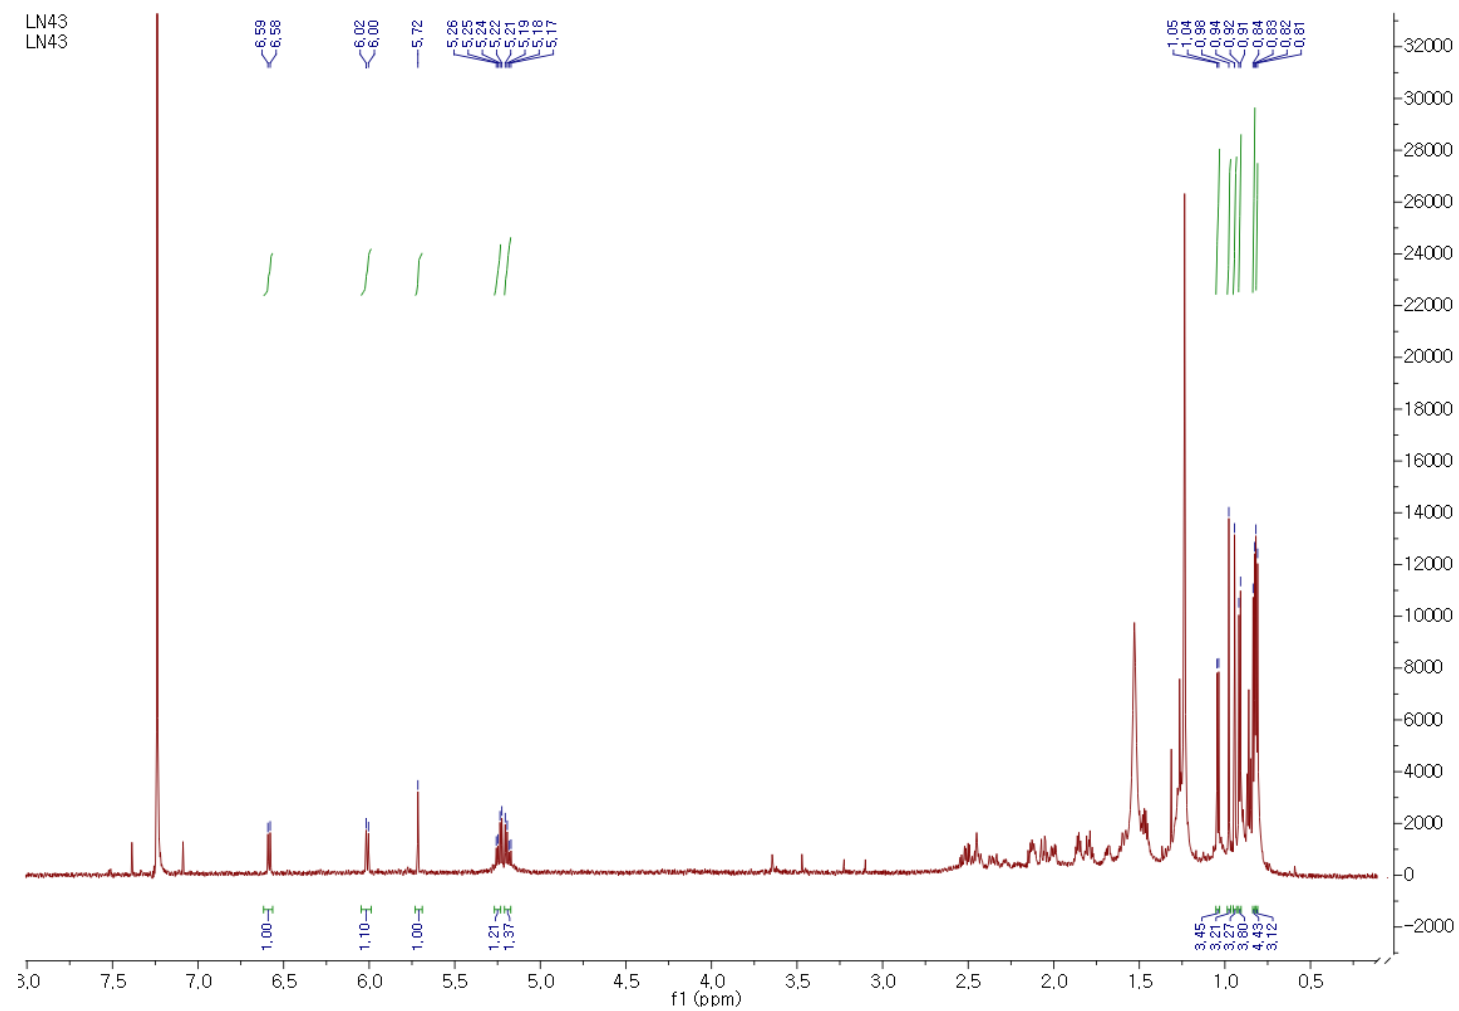



Figure S30.  $^1\text{H}$  NMR spectrum of **14** ( $\text{CDCl}_3$ , 700 MHz)

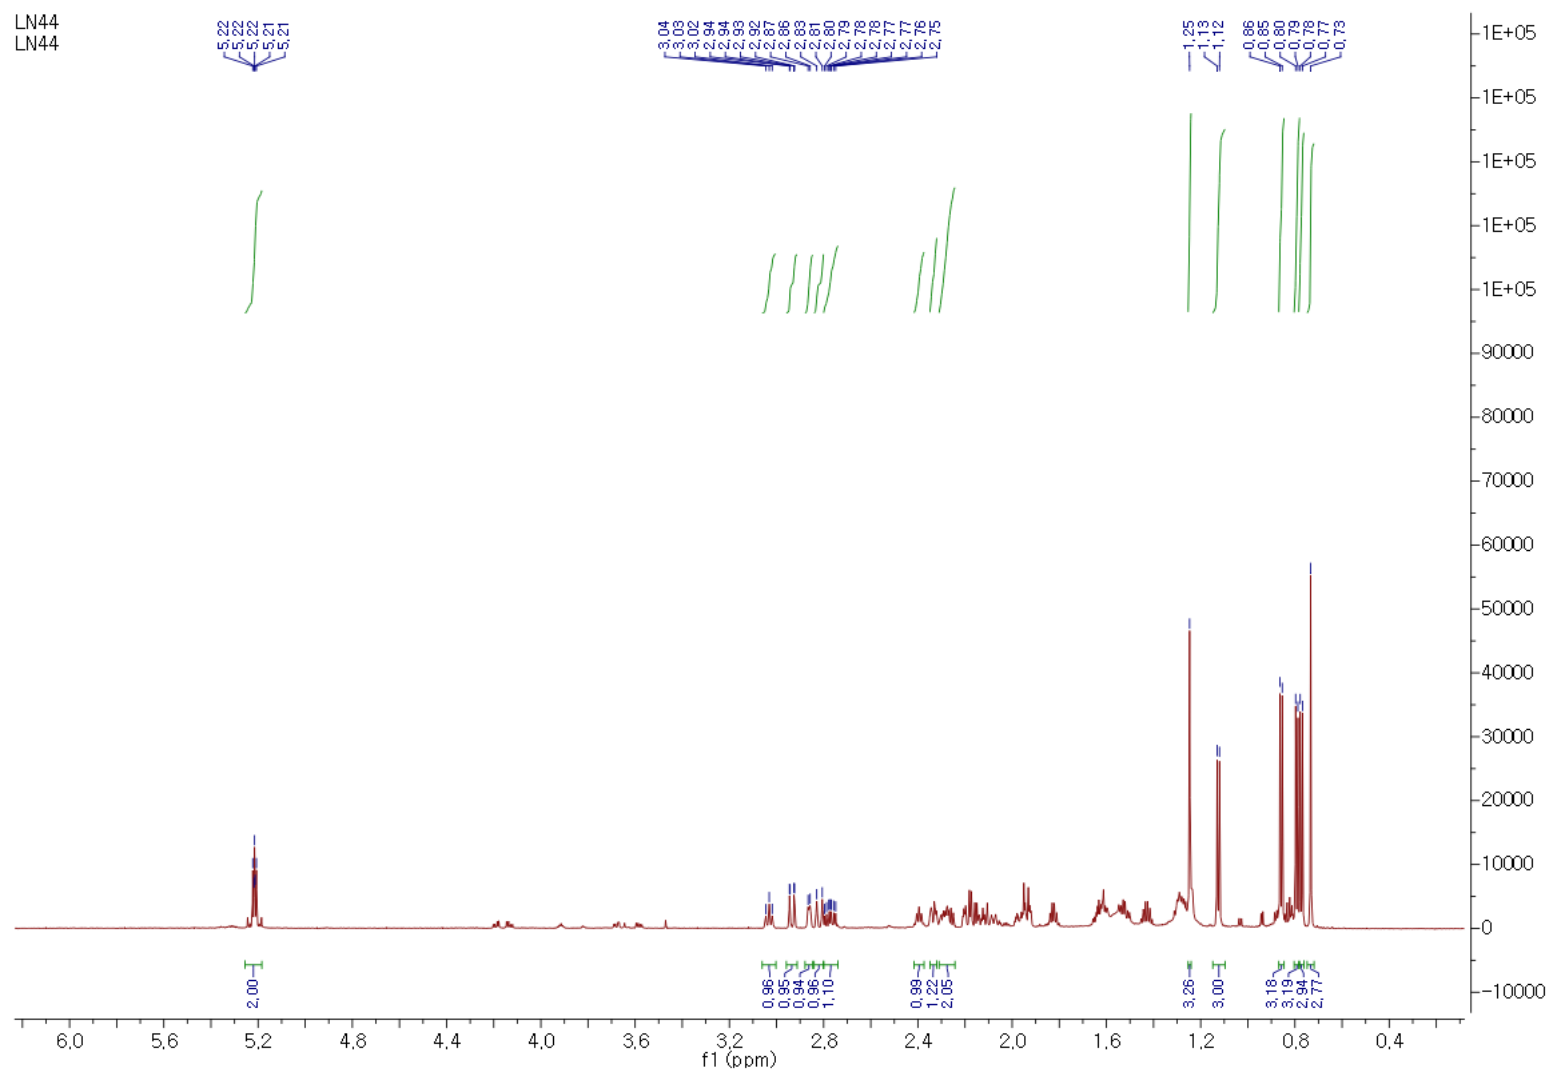

Figure S31.  $^{13}\text{C}$  NMR spectrum of **14** ( $\text{CDCl}_3$ , 175 MHz)

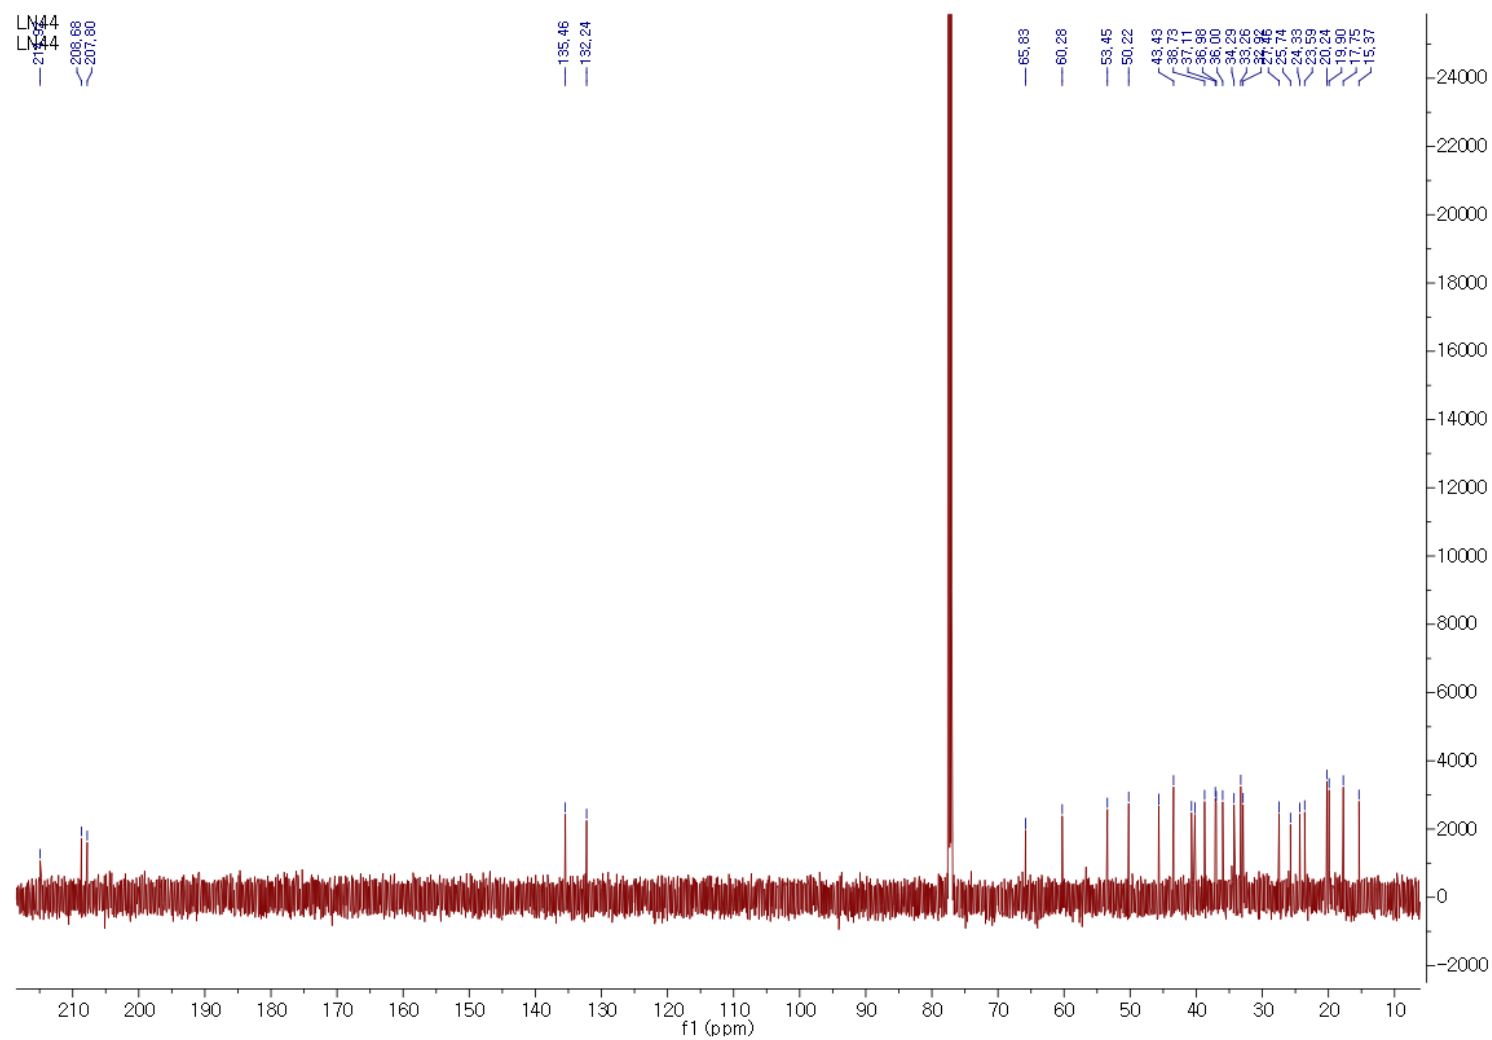

***In Vitro* Cytotoxicity Test.** A sulforhodamine B (SRB) bioassay was used to determine the cytotoxicity of compound **1** against human breast cancer cell lines (Bt549, HCC70, and MDA-MB-468). Each cell line was inoculated into standard 96-well, flat-bottom microplates and incubated for 24 h at 37 °C in a humidified atmosphere containing 5% CO<sub>2</sub>. The attached cells were then incubated with serially diluted isolates. After continuous exposure to the compounds for 72 h, the culture medium was removed from each well and the cells were fixed with 10% cold trichloroacetic acid at 4 °C for 1 h. After washing with tap water, the cells were stained with 0.4% SRB dye and incubated for 30 min at room temperature. The cells were washed with a 1% acetic acid solution, solubilized with 10 mM unbuffered Tris base solution (pH 10.5), and the absorbance was measured at 520 nm using a microtiter plate reader. The IC<sub>50</sub> of cancer cell growth was expressed as the mean from three independent experiments.
